# Supplementary material
Source: publisher site journal article supplement (https://www.dovepress.com/article/201983)
Supplement: Supplementary file 1 [file get_supplementary_file.php]

## SUPPLEMENTAL MATERIAL

### **Statin use and high-dose statin use after ischemic stroke in the UK: a retrospective cohort study**

Zhirong Yang<sup>1</sup>; Duncan Edwards<sup>1</sup>; Efthalia Massou<sup>1</sup>; Catherine L Saunders<sup>1</sup>; Carol Brayne<sup>2</sup>; Jonathan Mant<sup>1</sup>

<sup>1</sup> Primary Care Unit, Department of Public Health and Primary Care, School of Clinical Medicine, University of Cambridge, Cambridge, UK

<sup>2</sup> Institute of Public Health, School of Clinical Medicine, University of Cambridge, Cambridge, UK

|                             | <b>Page</b>                                                                                                                                       |            |
|-----------------------------|---------------------------------------------------------------------------------------------------------------------------------------------------|------------|
| <b>Table S1</b>             | <b>Codes for stroke</b>                                                                                                                           | <b>S1</b>  |
| <b>Table S2</b>             | <b>Codes for statin use</b>                                                                                                                       | <b>S3</b>  |
| <b>Table S3</b>             | <b>Criteria for quality control</b>                                                                                                               | <b>S11</b> |
| <b>Table S4</b>             | <b>Baseline characteristics of patients with specified ischemic and unspecified stroke</b>                                                        | <b>S12</b> |
| <b>Table S5</b>             | <b>Statin use patterns within two years after first stroke</b>                                                                                    | <b>S13</b> |
| <b>Table S6</b>             | <b>Factors associated with statin use in a time partitioned analysis</b>                                                                          | <b>S14</b> |
| <b>Table S7</b>             | <b>Sensitivity analysis for factors associated with statin use and high-intensity statin use in patients with specified ischemic stroke codes</b> | <b>S16</b> |
| <b>Table S8</b>             | <b>Sensitivity analysis for factors associated with statin use and high-intensity statin use in patients with no prior statin treatment</b>       | <b>S18</b> |
| <b>Figure S1</b>            | <b>Trend in statin use and intensity after stroke by stroke coding (A. Specified ischemic stroke; B. Unspecified stroke)</b>                      | <b>S20</b> |
| <b>Figure S2</b>            | <b>Log-log plots for statin use after stroke</b>                                                                                                  | <b>S21</b> |
| <b>The RECORD statement</b> | <b>– checklist of items, extended from the STROBE statement</b>                                                                                   | <b>S22</b> |

**Table S1. Codes for stroke**

| <b>Medcode</b> | <b>Readcode</b> | <b>Description</b>                                          | <b>Notes*</b> |
|----------------|-----------------|-------------------------------------------------------------|---------------|
| 569            | G64..12         | Infarction - cerebral                                       |               |
| 1298           | G66..11         | CVA unspecified                                             |               |
| 1469           | G66..00         | Stroke and cerebrovascular accident unspecified             |               |
| 3149           | G64z.00         | Cerebral infarction NOS                                     |               |
| 5185           | G64z111         | Lateral medullary syndrome                                  |               |
| 5363           | G64..11         | CVA - cerebral artery occlusion                             |               |
| 5602           | G64z.12         | Cerebellar infarction                                       |               |
| 6116           | G66..13         | CVA - Cerebrovascular accident unspecified                  |               |
| 6155           | G64..13         | Stroke due to cerebral arterial occlusion                   |               |
| 6253           | G66..12         | Stroke unspecified                                          |               |
| 7780           | G667.00         | Left sided CVA                                              |               |
| 8443           | G663.00         | Brain stem stroke syndrome                                  |               |
| 8837           | G64..00         | Cerebral arterial occlusion                                 |               |
| 9985           | G64z200         | Left sided cerebral infarction                              |               |
| 10504          | G64z300         | Right sided cerebral infarction                             |               |
| 12833          | G668.00         | Right sided CVA                                             |               |
| 15019          | G641.00         | Cerebral embolism                                           |               |
| 15252          | G64z.11         | Brainstem infarction NOS                                    |               |
| 16517          | G640.00         | Cerebral thrombosis                                         |               |
| 16956          | G669.00         | Cerebral palsy, not congenital or infantile, acute          |               |
| 17322          | G664.00         | Cerebellar stroke syndrome                                  |               |
| 18689          | G660.00         | Middle cerebral artery syndrome                             |               |
| 19260          | G662.00         | Posterior cerebral artery syndrome                          |               |
| 19280          | G661.00         | Anterior cerebral artery syndrome                           |               |
| 23671          | G63y000         | Cerebral infarct due to thrombosis of precerebral arteries  |               |
| 24446          | G63y100         | Cerebral infarction due to embolism of precerebral arteries |               |
| 25615          | G64z000         | Brainstem infarction                                        |               |
| 26424          | G64z400         | Infarction of basal ganglia                                 |               |
| 27975          | G641000         | Cerebral infarction due to embolism of cerebral arteries    |               |
| 33499          | G665.00         | Pure motor lacunar syndrome                                 |               |
| 33543          | G6X..00         | Cerebrl infarctn due/unspcf occlusn or sten/cerebrl artr    |               |
| 34758          | G641.11         | Cerebral embolus                                            |               |
| 36717          | G640000         | Cerebral infarction due to thrombosis of cerebral arteries  |               |
| 39344          | G676000         | Cereb infarct due cerebral venous thrombosis, nonpyogenic   |               |
| 40758          | G6W..00         | Cereb infarct due unsp occlus/stenos precerebr arteries     |               |
| 44765          | G653.00         | Carotid artery syndrome hemispheric                         |               |
| 47642          | G64z100         | Wallenberg syndrome                                         |               |
| 50594          | G654.00         | Multiple and bilateral precerebral artery syndromes         |               |
| 51767          | G666.00         | Pure sensory lacunar syndrome                               |               |
| 53745          | Gyu6400         | [X]Other cerebral infarction                                |               |
| 90572          | Gyu6500         | [X]Occlusion and stenosis of other precerebral arteries     |               |
| 91627          | Gyu6300         | [X]Cerebrl infarctn due/unspcf occlusn or sten/cerebrl artr |               |
| 92036          | Gyu6600         | [X]Occlusion and stenosis of other cerebral arteries        |               |
| 94482          | Gyu6G00         | [X]Cereb infarct due unsp occlus/stenos precerebr arteries  |               |

|       |         |                                                              |     |
|-------|---------|--------------------------------------------------------------|-----|
| 3535  | G61z.00 | Intracerebral haemorrhage NOS                                | ICH |
| 5051  | G61..00 | Intracerebral haemorrhage                                    | ICH |
| 6960  | G61..11 | CVA - cerebrovascular accid due to intracerebral haemorrhage | ICH |
| 7912  | G614.00 | Pontine haemorrhage                                          | ICH |
| 13564 | G613.00 | Cerebellar haemorrhage                                       | ICH |
| 18604 | G61..12 | Stroke due to intracerebral haemorrhage                      | ICH |
| 19201 | G61X100 | Right sided intracerebral haemorrhage, unspecified           | ICH |
| 28314 | G61X000 | Left sided intracerebral haemorrhage, unspecified            | ICH |
| 30045 | G616.00 | External capsule haemorrhage                                 | ICH |
| 30202 | G617.00 | Intracerebral haemorrhage, intraventricular                  | ICH |
| 31060 | G61X.00 | Intracerebral haemorrhage in hemisphere, unspecified         | ICH |
| 31595 | G610.00 | Cortical haemorrhage                                         | ICH |
| 40338 | G611.00 | Internal capsule haemorrhage                                 | ICH |
| 46316 | G612.00 | Basal nucleus haemorrhage                                    | ICH |
| 57315 | G618.00 | Intracerebral haemorrhage, multiple localized                | ICH |
| 62342 | G615.00 | Bulbar haemorrhage                                           | ICH |
| 96630 | Gyu6F00 | [X]Intracerebral haemorrhage in hemisphere, unspecified      | ICH |

\*All the codes listed in the table were used to identify patients with stroke from the Clinical Practice Research Datalink and the codes related to intracerebral hemorrhage (ICH) were then used to exclude patients with ICH as their first stroke.

**Table S2. Codes for statin use**

| <b>Prodcodes</b> | <b>Product Name</b>                                                |
|------------------|--------------------------------------------------------------------|
| 47090            | Atorvastatin 10mg chewable tablets sugar free                      |
| 56097            | Atorvastatin 10mg chewable tablets sugar free                      |
| 28               | Atorvastatin 10mg tablets                                          |
| 51134            | Atorvastatin 10mg tablets (A A H Pharmaceuticals Ltd)              |
| 55727            | Atorvastatin 10mg tablets (Actavis UK Ltd)                         |
| 63140            | Atorvastatin 10mg tablets (Alliance Healthcare (Distribution) Ltd) |
| 67846            | Atorvastatin 10mg tablets (Almus Pharmaceuticals Ltd)              |
| 68023            | Atorvastatin 10mg tablets (Aspire Pharma Ltd)                      |
| 57348            | Atorvastatin 10mg tablets (Consilient Health Ltd)                  |
| 58834            | Atorvastatin 10mg tablets (DE Pharmaceuticals)                     |
| 67573            | Atorvastatin 10mg tablets (DE Pharmaceuticals)                     |
| 55032            | Atorvastatin 10mg tablets (Dexcel-Pharma Ltd)                      |
| 70987            | Atorvastatin 10mg tablets (Dr Reddy's Laboratories (UK) Ltd)       |
| 68785            | Atorvastatin 10mg tablets (Mylan)                                  |
| 54535            | Atorvastatin 10mg tablets (Pfizer Ltd)                             |
| 64825            | Atorvastatin 10mg tablets (Phoenix Healthcare Distribution Ltd)    |
| 59357            | Atorvastatin 10mg tablets (Ranbaxy (UK) Ltd)                       |
| 58868            | Atorvastatin 10mg tablets (Sigma Pharmaceuticals Plc)              |
| 70693            | Atorvastatin 10mg tablets (Sigma Pharmaceuticals Plc)              |
| 59859            | Atorvastatin 10mg tablets (Teva UK Ltd)                            |
| 61149            | Atorvastatin 10mg tablets (Waymade Healthcare Plc)                 |
| 50236            | Atorvastatin 10mg tablets (Zentiva)                                |
| 48518            | Atorvastatin 10mg/5ml oral solution                                |
| 54992            | Atorvastatin 10mg/5ml oral suspension                              |
| 47065            | Atorvastatin 20mg chewable tablets sugar free                      |
| 56165            | Atorvastatin 20mg chewable tablets sugar free                      |
| 75               | Atorvastatin 20mg tablets                                          |
| 49558            | Atorvastatin 20mg tablets (A A H Pharmaceuticals Ltd)              |
| 52211            | Atorvastatin 20mg tablets (Actavis UK Ltd)                         |
| 58394            | Atorvastatin 20mg tablets (Alliance Healthcare (Distribution) Ltd) |
| 56564            | Atorvastatin 20mg tablets (Almus Pharmaceuticals Ltd)              |
| 51359            | Atorvastatin 20mg tablets (Arrow Generics Ltd)                     |
| 52168            | Atorvastatin 20mg tablets (Aspire Pharma Ltd)                      |
| 72164            | Atorvastatin 20mg tablets (Bristol Laboratories Ltd)               |
| 51622            | Atorvastatin 20mg tablets (Consilient Health Ltd)                  |
| 62219            | Atorvastatin 20mg tablets (DE Pharmaceuticals)                     |
| 62429            | Atorvastatin 20mg tablets (DE Pharmaceuticals)                     |
| 50790            | Atorvastatin 20mg tablets (Dexcel-Pharma Ltd)                      |
| 71017            | Atorvastatin 20mg tablets (Dr Reddy's Laboratories (UK) Ltd)       |
| 68467            | Atorvastatin 20mg tablets (Kent Pharmaceuticals Ltd)               |
| 68827            | Atorvastatin 20mg tablets (Mylan)                                  |
| 50788            | Atorvastatin 20mg tablets (Pfizer Ltd)                             |
| 68048            | Atorvastatin 20mg tablets (Phoenix Healthcare Distribution Ltd)    |
| 65193            | Atorvastatin 20mg tablets (Ranbaxy (UK) Ltd)                       |

---

|       |                                                                    |
|-------|--------------------------------------------------------------------|
| 56248 | Atorvastatin 20mg tablets (Sigma Pharmaceuticals Plc)              |
| 58041 | Atorvastatin 20mg tablets (Teva UK Ltd)                            |
| 59272 | Atorvastatin 20mg tablets (Waymade Healthcare Plc)                 |
| 72213 | Atorvastatin 20mg tablets (Wockhardt UK Ltd)                       |
| 58110 | Atorvastatin 20mg tablets (Zentiva)                                |
| 64067 | Atorvastatin 20mg/5ml oral solution                                |
| 60464 | Atorvastatin 20mg/5ml oral suspension                              |
| 48973 | Atorvastatin 30mg tablets                                          |
| 64702 | Atorvastatin 30mg tablets (A A H Pharmaceuticals Ltd)              |
| 63469 | Atorvastatin 30mg tablets (Consilient Health Ltd)                  |
| 745   | Atorvastatin 40mg tablets                                          |
| 52398 | Atorvastatin 40mg tablets (A A H Pharmaceuticals Ltd)              |
| 53887 | Atorvastatin 40mg tablets (Actavis UK Ltd)                         |
| 49751 | Atorvastatin 40mg tablets (Alliance Healthcare (Distribution) Ltd) |
| 59446 | Atorvastatin 40mg tablets (Almus Pharmaceuticals Ltd)              |
| 51200 | Atorvastatin 40mg tablets (Arrow Generics Ltd)                     |
| 52460 | Atorvastatin 40mg tablets (Aspire Pharma Ltd)                      |
| 51876 | Atorvastatin 40mg tablets (Consilient Health Ltd)                  |
| 57834 | Atorvastatin 40mg tablets (DE Pharmaceuticals)                     |
| 56841 | Atorvastatin 40mg tablets (Dexcel-Pharma Ltd)                      |
| 52397 | Atorvastatin 40mg tablets (Dr Reddy's Laboratories (UK) Ltd)       |
| 67402 | Atorvastatin 40mg tablets (Kent Pharmaceuticals Ltd)               |
| 69427 | Atorvastatin 40mg tablets (Mylan)                                  |
| 50272 | Atorvastatin 40mg tablets (Pfizer Ltd)                             |
| 64810 | Atorvastatin 40mg tablets (Phoenix Healthcare Distribution Ltd)    |
| 60511 | Atorvastatin 40mg tablets (Ranbaxy (UK) Ltd)                       |
| 64868 | Atorvastatin 40mg tablets (Sigma Pharmaceuticals Plc)              |
| 50963 | Atorvastatin 40mg tablets (Teva UK Ltd)                            |
| 52097 | Atorvastatin 40mg tablets (Wockhardt UK Ltd)                       |
| 55444 | Atorvastatin 40mg tablets (Zentiva)                                |
| 55034 | Atorvastatin 40mg/5ml oral suspension                              |
| 48346 | Atorvastatin 60mg tablets                                          |
| 5775  | Atorvastatin 80mg tablets                                          |
| 58418 | Atorvastatin 80mg tablets (A A H Pharmaceuticals Ltd)              |
| 52459 | Atorvastatin 80mg tablets (Actavis UK Ltd)                         |
| 53772 | Atorvastatin 80mg tablets (Alliance Healthcare (Distribution) Ltd) |
| 62476 | Atorvastatin 80mg tablets (Almus Pharmaceuticals Ltd)              |
| 58742 | Atorvastatin 80mg tablets (Arrow Generics Ltd)                     |
| 59776 | Atorvastatin 80mg tablets (Aspire Pharma Ltd)                      |
| 63249 | Atorvastatin 80mg tablets (Consilient Health Ltd)                  |
| 60607 | Atorvastatin 80mg tablets (DE Pharmaceuticals)                     |
| 52821 | Atorvastatin 80mg tablets (Dr Reddy's Laboratories (UK) Ltd)       |
| 53890 | Atorvastatin 80mg tablets (Pfizer Ltd)                             |
| 60989 | Atorvastatin 80mg tablets (Phoenix Healthcare Distribution Ltd)    |
| 67660 | Atorvastatin 80mg tablets (Ranbaxy (UK) Ltd)                       |
| 66963 | Atorvastatin 80mg tablets (Sigma Pharmaceuticals Plc)              |

---

---

|       |                                                                    |
|-------|--------------------------------------------------------------------|
| 57836 | Atorvastatin 80mg tablets (Teva UK Ltd)                            |
| 57117 | Atorvastatin 80mg tablets (Waymade Healthcare Plc)                 |
| 69093 | Atorvastatin 80mg tablets (Wockhardt UK Ltd)                       |
| 56182 | Atorvastatin 80mg tablets (Zentiva)                                |
| 420   | Cerivastatin 100microgram tablets                                  |
| 5009  | Cerivastatin 200microgram tablets                                  |
| 5251  | Cerivastatin 300microgram tablets                                  |
| 5278  | Cerivastatin 400microgram tablets                                  |
| 31658 | Cerivastatin 800microgram tablets                                  |
| 69528 | Cholib 145mg/20mg tablets (Mylan)                                  |
| 70486 | Cholib 145mg/40mg tablets (Mylan)                                  |
| 7347  | Crestor 10mg tablets (AstraZeneca UK Ltd)                          |
| 53460 | Crestor 10mg tablets (DE Pharmaceuticals)                          |
| 15252 | Crestor 20mg tablets (AstraZeneca UK Ltd)                          |
| 70308 | Crestor 20mg tablets (Sigma Pharmaceuticals Plc)                   |
| 59447 | Crestor 20mg tablets (Waymade Healthcare Plc)                      |
| 9930  | Crestor 40mg tablets (AstraZeneca UK Ltd)                          |
| 57999 | Crestor 40mg tablets (Lexon (UK) Ltd)                              |
| 17688 | Crestor 5mg tablets (AstraZeneca UK Ltd)                           |
| 66780 | Fenofibrate 145mg / Simvastatin 20mg tablets                       |
| 66505 | Fenofibrate 145mg / Simvastatin 40mg tablets                       |
| 379   | Fluvastatin 20mg capsules                                          |
| 62148 | Fluvastatin 20mg capsules (Actavis UK Ltd)                         |
| 72308 | Fluvastatin 20mg capsules (Alliance Healthcare (Distribution) Ltd) |
| 59278 | Fluvastatin 20mg capsules (Zentiva)                                |
| 2137  | Fluvastatin 40mg capsules                                          |
| 53770 | Fluvastatin 40mg capsules (A A H Pharmaceuticals Ltd)              |
| 71029 | Fluvastatin 40mg capsules (Sandoz Ltd)                             |
| 11627 | Fluvastatin 80mg modified-release tablets                          |
| 21020 | Inegy 10mg/20mg tablets (Merck Sharp & Dohme Ltd)                  |
| 17059 | Inegy 10mg/40mg tablets (Merck Sharp & Dohme Ltd)                  |
| 16186 | Inegy 10mg/80mg tablets (Merck Sharp & Dohme Ltd)                  |
| 8380  | Lescol 20mg capsules (Novartis Pharmaceuticals UK Ltd)             |
| 9153  | Lescol 40mg capsules (Novartis Pharmaceuticals UK Ltd)             |
| 67328 | Lescol XL 80mg tablets (Mawdsley-Brooks & Company Ltd)             |
| 5985  | Lescol XL 80mg tablets (Novartis Pharmaceuticals UK Ltd)           |
| 47721 | Lipitor 10mg chewable tablets (Pfizer Ltd)                         |
| 59331 | Lipitor 10mg tablets (DE Pharmaceuticals)                          |
| 3411  | Lipitor 10mg tablets (Pfizer Ltd)                                  |
| 47630 | Lipitor 20mg chewable tablets (Pfizer Ltd)                         |
| 56016 | Lipitor 20mg chewable tablets (Pfizer Ltd)                         |
| 7374  | Lipitor 20mg tablets (Pfizer Ltd)                                  |
| 2955  | Lipitor 40mg tablets (Pfizer Ltd)                                  |
| 53594 | Lipitor 80mg tablets (Mawdsley-Brooks & Company Ltd)               |
| 17683 | Lipitor 80mg tablets (Pfizer Ltd)                                  |
| 9315  | Lipobay 100microgram Tablet (Bayer Plc)                            |

---

---

|       |                                                                   |
|-------|-------------------------------------------------------------------|
| 53813 | Lipobay 100microgram tablets (Bayer Plc)                          |
| 9316  | Lipobay 200microgram Tablet (Bayer Plc)                           |
| 55207 | Lipobay 200microgram tablets (Bayer Plc)                          |
| 4961  | Lipobay 300microgram Tablet (Bayer Plc)                           |
| 58480 | Lipobay 300microgram tablets (Bayer Plc)                          |
| 18442 | Lipobay 400microgram Tablet (Bayer Plc)                           |
| 62132 | Lipobay 400microgram tablets (Bayer Plc)                          |
| 1221  | Lipostat 10mg tablets (Bristol-Myers Squibb Pharmaceuticals Ltd)  |
| 3690  | Lipostat 20mg tablets (Bristol-Myers Squibb Pharmaceuticals Ltd)  |
| 1223  | Lipostat 40mg tablets (Bristol-Myers Squibb Pharmaceuticals Ltd)  |
| 32921 | Pravastatin 10mg Tablet (Dr Reddy's Laboratories (UK) Ltd)        |
| 490   | Pravastatin 10mg tablets                                          |
| 68156 | Pravastatin 10mg tablets (A A H Pharmaceuticals Ltd)              |
| 57397 | Pravastatin 10mg tablets (Accord Healthcare Ltd)                  |
| 57137 | Pravastatin 10mg tablets (Almus Pharmaceuticals Ltd)              |
| 71015 | Pravastatin 10mg tablets (Medreich Plc)                           |
| 60251 | Pravastatin 10mg tablets (Sandoz Ltd)                             |
| 50925 | Pravastatin 10mg tablets (Sigma Pharmaceuticals Plc)              |
| 43218 | Pravastatin 10mg tablets (Teva UK Ltd)                            |
| 63787 | Pravastatin 10mg tablets (Tillomed Laboratories Ltd)              |
| 56146 | Pravastatin 10mg tablets (Waymade Healthcare Plc)                 |
| 730   | Pravastatin 20mg tablets                                          |
| 40382 | Pravastatin 20mg tablets (A A H Pharmaceuticals Ltd)              |
| 59508 | Pravastatin 20mg tablets (Accord Healthcare Ltd)                  |
| 52755 | Pravastatin 20mg tablets (Alliance Healthcare (Distribution) Ltd) |
| 54607 | Pravastatin 20mg tablets (Almus Pharmaceuticals Ltd)              |
| 51890 | Pravastatin 20mg tablets (Medreich Plc)                           |
| 56735 | Pravastatin 20mg tablets (Mylan)                                  |
| 57296 | Pravastatin 20mg tablets (Phoenix Healthcare Distribution Ltd)    |
| 63074 | Pravastatin 20mg tablets (PLIVA Pharma Ltd)                       |
| 67829 | Pravastatin 20mg tablets (Sandoz Ltd)                             |
| 61134 | Pravastatin 20mg tablets (Sigma Pharmaceuticals Plc)              |
| 36377 | Pravastatin 20mg tablets (Teva UK Ltd)                            |
| 56607 | Pravastatin 20mg tablets (Waymade Healthcare Plc)                 |
| 1219  | Pravastatin 40mg tablets                                          |
| 34820 | Pravastatin 40mg tablets (A A H Pharmaceuticals Ltd)              |
| 56893 | Pravastatin 40mg tablets (Accord Healthcare Ltd)                  |
| 72048 | Pravastatin 40mg tablets (Actavis UK Ltd)                         |
| 55912 | Pravastatin 40mg tablets (Alliance Healthcare (Distribution) Ltd) |
| 54435 | Pravastatin 40mg tablets (Almus Pharmaceuticals Ltd)              |
| 62979 | Pravastatin 40mg tablets (Kent Pharmaceuticals Ltd)               |
| 51676 | Pravastatin 40mg tablets (Medreich Plc)                           |
| 47988 | Pravastatin 40mg tablets (Mylan)                                  |
| 56916 | Pravastatin 40mg tablets (PLIVA Pharma Ltd)                       |
| 48097 | Pravastatin 40mg tablets (Teva UK Ltd)                            |
| 57108 | Pravastatin 40mg tablets (Waymade Healthcare Plc)                 |

---

---

|       |                                                                   |
|-------|-------------------------------------------------------------------|
| 72149 | Pravastatin 5mg/5ml oral suspension                               |
| 44878 | Ranzolont 10mg tablets (Ranbaxy (UK) Ltd)                         |
| 713   | Rosuvastatin 10mg tablets                                         |
| 57763 | Rosuvastatin 10mg tablets (Waymade Healthcare Plc)                |
| 6213  | Rosuvastatin 20mg tablets                                         |
| 71014 | Rosuvastatin 20mg tablets (Waymade Healthcare Plc)                |
| 58617 | Rosuvastatin 20mg/5ml oral suspension                             |
| 9897  | Rosuvastatin 40mg tablets                                         |
| 7554  | Rosuvastatin 5mg tablets                                          |
| 60160 | Rosuvastatin 5mg tablets (Mawdsley-Brooks & Company Ltd)          |
| 59452 | Rosuvastatin 5mg tablets (Waymade Healthcare Plc)                 |
| 13041 | Simvador 10mg tablets (Discovery Pharmaceuticals)                 |
| 9920  | Simvador 20mg tablets (Discovery Pharmaceuticals)                 |
| 802   | Simvador 40mg tablets (Discovery Pharmaceuticals)                 |
| 39870 | Simvador 80mg tablets (Discovery Pharmaceuticals)                 |
| 24509 | SIMVASTATIN                                                       |
| 29438 | SIMVASTATIN                                                       |
| 34560 | Simvastatin 10mg Tablet (Ratiopharm UK Ltd)                       |
| 42    | Simvastatin 10mg tablets                                          |
| 34955 | Simvastatin 10mg tablets (A A H Pharmaceuticals Ltd)              |
| 54655 | Simvastatin 10mg tablets (Accord Healthcare Ltd)                  |
| 48078 | Simvastatin 10mg tablets (Actavis UK Ltd)                         |
| 51233 | Simvastatin 10mg tablets (Alliance Healthcare (Distribution) Ltd) |
| 61360 | Simvastatin 10mg tablets (Almus Pharmaceuticals Ltd)              |
| 47774 | Simvastatin 10mg tablets (Arrow Generics Ltd)                     |
| 53822 | Simvastatin 10mg tablets (Bristol Laboratories Ltd)               |
| 67098 | Simvastatin 10mg tablets (Brown & Burk UK Ltd)                    |
| 64180 | Simvastatin 10mg tablets (Crescent Pharma Ltd)                    |
| 64968 | Simvastatin 10mg tablets (DE Pharmaceuticals)                     |
| 53908 | Simvastatin 10mg tablets (Dexcel-Pharma Ltd)                      |
| 72050 | Simvastatin 10mg tablets (Genesis Pharmaceuticals Ltd)            |
| 34481 | Simvastatin 10mg tablets (IVAX Pharmaceuticals UK Ltd)            |
| 48051 | Simvastatin 10mg tablets (Kent Pharmaceuticals Ltd)               |
| 51085 | Simvastatin 10mg tablets (Medreich Plc)                           |
| 53415 | Simvastatin 10mg tablets (Milpharm Ltd)                           |
| 34535 | Simvastatin 10mg tablets (Mylan)                                  |
| 58755 | Simvastatin 10mg tablets (Phoenix Healthcare Distribution Ltd)    |
| 48058 | Simvastatin 10mg tablets (Ranbaxy (UK) Ltd)                       |
| 54493 | Simvastatin 10mg tablets (Relonchem Ltd)                          |
| 61321 | Simvastatin 10mg tablets (Sandoz Ltd)                             |
| 51715 | Simvastatin 10mg tablets (Sigma Pharmaceuticals Plc)              |
| 54976 | Simvastatin 10mg tablets (Somex Pharma)                           |
| 40340 | Simvastatin 10mg tablets (Teva UK Ltd)                            |
| 47948 | Simvastatin 10mg tablets (Tillomed Laboratories Ltd)              |
| 61665 | Simvastatin 10mg tablets (Waymade Healthcare Plc)                 |
| 52625 | Simvastatin 10mg tablets (Wockhardt UK Ltd)                       |

---



---

|       |                                                                                          |
|-------|------------------------------------------------------------------------------------------|
| 67745 | Simvastatin 10mg tablets (Zentiva)                                                       |
| 52676 | Simvastatin 10mg/5ml oral suspension                                                     |
| 7552  | Simvastatin 20mg / Ezetimibe 10mg tablets                                                |
| 34746 | Simvastatin 20mg Tablet (Niche Generics Ltd)                                             |
| 34476 | Simvastatin 20mg Tablet (Ratiopharm UK Ltd)                                              |
| 25    | Simvastatin 20mg tablets                                                                 |
| 33082 | Simvastatin 20mg tablets (A A H Pharmaceuticals Ltd)                                     |
| 52257 | Simvastatin 20mg tablets (Accord Healthcare Ltd)                                         |
| 45245 | Simvastatin 20mg tablets (Actavis UK Ltd)                                                |
| 49062 | Simvastatin 20mg tablets (Alliance Healthcare (Distribution) Ltd)                        |
| 54947 | Simvastatin 20mg tablets (Almus Pharmaceuticals Ltd)                                     |
| 48018 | Simvastatin 20mg tablets (Arrow Generics Ltd)                                            |
| 52953 | Simvastatin 20mg tablets (Bristol Laboratories Ltd)                                      |
| 69413 | Simvastatin 20mg tablets (Brown & Burk UK Ltd)                                           |
| 64104 | Simvastatin 20mg tablets (Crescent Pharma Ltd)                                           |
| 65679 | Simvastatin 20mg tablets (DE Pharmaceuticals)                                            |
| 39060 | Simvastatin 20mg tablets (Dexcel-Pharma Ltd)                                             |
| 68686 | Simvastatin 20mg tablets (Genesis Pharmaceuticals Ltd)                                   |
| 34366 | Simvastatin 20mg tablets (IVAX Pharmaceuticals UK Ltd)                                   |
| 34891 | Simvastatin 20mg tablets (Kent Pharmaceuticals Ltd)                                      |
| 50754 | Simvastatin 20mg tablets (Medreich Plc)                                                  |
| 51483 | Simvastatin 20mg tablets (Milpharm Ltd)                                                  |
| 34312 | Simvastatin 20mg tablets (Mylan)                                                         |
| 55452 | Simvastatin 20mg tablets (Phoenix Healthcare Distribution Ltd)                           |
| 40601 | Simvastatin 20mg tablets (Ranbaxy (UK) Ltd)                                              |
| 50564 | Simvastatin 20mg tablets (Relonchem Ltd)                                                 |
| 45235 | Simvastatin 20mg tablets (Sandoz Ltd)                                                    |
| 52812 | Simvastatin 20mg tablets (Sigma Pharmaceuticals Plc)                                     |
| 53087 | Simvastatin 20mg tablets (Somex Pharma)                                                  |
| 34316 | Simvastatin 20mg tablets (Teva UK Ltd)                                                   |
| 53676 | Simvastatin 20mg tablets (Tillomed Laboratories Ltd)                                     |
| 58315 | Simvastatin 20mg tablets (Waymade Healthcare Plc)                                        |
| 34814 | Simvastatin 20mg tablets (Wockhardt UK Ltd)                                              |
| 67773 | Simvastatin 20mg tablets (Zentiva)                                                       |
| 11815 | Simvastatin 20mg with ezetimibe 10mg tablet                                              |
| 818   | Simvastatin 20mg/5ml oral solution sugar free                                            |
| 54266 | Simvastatin 20mg/5ml oral suspension                                                     |
| 39675 | Simvastatin 20mg/5ml Oral suspension (Martindale Pharmaceuticals Ltd)                    |
| 48221 | Simvastatin 20mg/5ml oral suspension sugar free                                          |
| 54606 | Simvastatin 20mg/5ml oral suspension sugar free (A A H Pharmaceuticals Ltd)              |
| 65925 | Simvastatin 20mg/5ml oral suspension sugar free (Alliance Healthcare (Distribution) Ltd) |
| 44528 | Simvastatin 20mg/5ml oral suspension sugar free (Rosemont Pharmaceuticals Ltd)           |
| 56065 | Simvastatin 20mg/5ml oral suspension sugar free (Waymade Healthcare Plc)                 |
| 57329 | Simvastatin 25mg/5ml oral suspension                                                     |
| 10172 | Simvastatin 40mg / Ezetimibe 10mg tablets                                                |
| 34879 | Simvastatin 40mg Tablet (Niche Generics Ltd)                                             |

---

---

|       |                                                                                |
|-------|--------------------------------------------------------------------------------|
| 34545 | Simvastatin 40mg Tablet (Ratiopharm UK Ltd)                                    |
| 51    | Simvastatin 40mg tablets                                                       |
| 34502 | Simvastatin 40mg tablets (A A H Pharmaceuticals Ltd)                           |
| 50703 | Simvastatin 40mg tablets (Accord Healthcare Ltd)                               |
| 34969 | Simvastatin 40mg tablets (Actavis UK Ltd)                                      |
| 48867 | Simvastatin 40mg tablets (Alliance Healthcare (Distribution) Ltd)              |
| 46878 | Simvastatin 40mg tablets (Almus Pharmaceuticals Ltd)                           |
| 45346 | Simvastatin 40mg tablets (Arrow Generics Ltd)                                  |
| 49061 | Simvastatin 40mg tablets (Bristol Laboratories Ltd)                            |
| 68563 | Simvastatin 40mg tablets (Brown & Burk UK Ltd)                                 |
| 64307 | Simvastatin 40mg tablets (Crescent Pharma Ltd)                                 |
| 65181 | Simvastatin 40mg tablets (DE Pharmaceuticals)                                  |
| 44650 | Simvastatin 40mg tablets (Dexcel-Pharma Ltd)                                   |
| 34381 | Simvastatin 40mg tablets (IVAX Pharmaceuticals UK Ltd)                         |
| 45219 | Simvastatin 40mg tablets (Kent Pharmaceuticals Ltd)                            |
| 51166 | Simvastatin 40mg tablets (Medreich Plc)                                        |
| 50670 | Simvastatin 40mg tablets (Milpharm Ltd)                                        |
| 34353 | Simvastatin 40mg tablets (Mylan)                                               |
| 53966 | Simvastatin 40mg tablets (Phoenix Healthcare Distribution Ltd)                 |
| 52098 | Simvastatin 40mg tablets (Ranbaxy (UK) Ltd)                                    |
| 50483 | Simvastatin 40mg tablets (Relonchem Ltd)                                       |
| 37434 | Simvastatin 40mg tablets (Sandoz Ltd)                                          |
| 54240 | Simvastatin 40mg tablets (Sigma Pharmaceuticals Plc)                           |
| 50882 | Simvastatin 40mg tablets (Somex Pharma)                                        |
| 34376 | Simvastatin 40mg tablets (Teva UK Ltd)                                         |
| 62137 | Simvastatin 40mg tablets (Waymade Healthcare Plc)                              |
| 34907 | Simvastatin 40mg tablets (Wockhardt UK Ltd)                                    |
| 65901 | Simvastatin 40mg tablets (Zentiva)                                             |
| 10183 | Simvastatin 40mg with ezetimibe 10mg tablet                                    |
| 39652 | Simvastatin 40mg/5ml oral solution sugar free                                  |
| 54985 | Simvastatin 40mg/5ml oral suspension                                           |
| 48431 | Simvastatin 40mg/5ml oral suspension sugar free                                |
| 61155 | Simvastatin 40mg/5ml oral suspension sugar free (A A H Pharmaceuticals Ltd)    |
| 54819 | Simvastatin 40mg/5ml oral suspension sugar free (Rosemont Pharmaceuticals Ltd) |
| 14219 | Simvastatin 80mg / Ezetimibe 10mg tablets                                      |
| 5148  | Simvastatin 80mg tablets                                                       |
| 32909 | Simvastatin 80mg tablets (A A H Pharmaceuticals Ltd)                           |
| 49587 | Simvastatin 80mg tablets (Almus Pharmaceuticals Ltd)                           |
| 46956 | Simvastatin 80mg tablets (Arrow Generics Ltd)                                  |
| 71773 | Simvastatin 80mg tablets (Brown & Burk UK Ltd)                                 |
| 52962 | Simvastatin 80mg tablets (Medreich Plc)                                        |
| 41657 | Simvastatin 80mg tablets (Teva UK Ltd)                                         |
| 10206 | Simvastatin 80mg with ezetimibe 10mg tablet                                    |
| 57568 | Zocor 10mg tablets (Lexon (UK) Ltd)                                            |
| 2718  | Zocor 10mg tablets (Merck Sharp & Dohme Ltd)                                   |
| 56481 | Zocor 10mg tablets (Sigma Pharmaceuticals Plc)                                 |

---

---

|       |                                                   |
|-------|---------------------------------------------------|
| 7196  | Zocor 20mg tablets (Merck Sharp & Dohme Ltd)      |
| 56494 | Zocor 20mg tablets (Sigma Pharmaceuticals Plc)    |
| 53340 | Zocor 40mg tablets (Lexon (UK) Ltd)               |
| 6168  | Zocor 40mg tablets (Merck Sharp & Dohme Ltd)      |
| 22579 | Zocor 80mg tablets (Merck Sharp & Dohme Ltd)      |
| 31930 | Zocor heart-pro 10mg Tablet (McNeil Products Ltd) |

---

**Table S3. Criteria for quality control**

| <b>Data item</b>                                                                                | <b>Unacceptable value</b>                                                                                                                      |
|-------------------------------------------------------------------------------------------------|------------------------------------------------------------------------------------------------------------------------------------------------|
| <b>ALL</b> the records of a patient were excluded for any reason below:                         |                                                                                                                                                |
| First registration date                                                                         | Empty; invalid date; prior to year of birth; within one year before the first stroke diagnosis date                                            |
| Current registration date                                                                       | Invalid date; prior to first registration date; prior to year of birth                                                                         |
| Transferred out date                                                                            | Invalid date; present with no reason; prior to first registration date; prior to current registration date                                     |
| A transferred out reason                                                                        | Present with no date                                                                                                                           |
| Registration status                                                                             | Temporary patients                                                                                                                             |
| Age                                                                                             | Over 125 years at the end of follow-up                                                                                                         |
| Year of birth                                                                                   | Absent                                                                                                                                         |
| Gender                                                                                          | Other than male, female or indeterminate                                                                                                       |
| Death date                                                                                      | Prior to the first registration date; prior to the current registration date                                                                   |
| <b>RELEVANT</b> episode records of a patient were excluded for any reason below:                |                                                                                                                                                |
| Event date                                                                                      | Invalid; absent; prior to birth year                                                                                                           |
| Weight                                                                                          | <30kg; >300kg                                                                                                                                  |
| Height                                                                                          | <1.1 metres; >2.3 metres                                                                                                                       |
| The date were <b>CHANGED</b> for any reason below:                                              |                                                                                                                                                |
| Change the death date and transferred out date to the first stroke diagnosis date               | Death date prior to the first stroke diagnosis date; transferred out date prior to the first stroke diagnosis date                             |
| Change the death date and transferred out date to the last post-stroke statin prescription date | Death date prior to the last post-stroke statin prescription date; transferred out date prior to the last post-stroke statin prescription date |

**Table S4. Baseline characteristics of patients with specified ischemic and unspecified stroke**

| Factor                                | Specified ischemic<br>(n=26,339) |        | Unspecified<br>(n=54,103) |        | Total<br>(N=80,442) |        |
|---------------------------------------|----------------------------------|--------|---------------------------|--------|---------------------|--------|
| <b>Demographics</b>                   |                                  |        |                           |        |                     |        |
| Age (Year)                            |                                  |        |                           |        |                     |        |
| Mean (SD)                             | 72.7                             | (13.1) | 75.1                      | (12.8) | 74.3                | (12.9) |
| Female (%)                            | 12,803                           | (48.6) | 28,533                    | (52.7) | 41,336              | (51.4) |
| IMD (%) <sup>a</sup>                  |                                  |        |                           |        |                     |        |
| Group 1                               | 5,898                            | (22.4) | 10,933                    | (20.2) | 16,831              | (20.9) |
| Group 2                               | 5,507                            | (20.9) | 10,480                    | (19.4) | 15,987              | (19.9) |
| Group 3                               | 5,354                            | (20.3) | 11,255                    | (20.8) | 16,609              | (20.7) |
| Group 4                               | 5,092                            | (19.3) | 10,445                    | (19.3) | 15,537              | (19.3) |
| Group 5                               | 4,482                            | (17.0) | 10,869                    | (20.3) | 15,442              | (19.2) |
| <b>Prior medical conditions (%)</b>   |                                  |        |                           |        |                     |        |
| AF                                    | 4,404                            | (16.7) | 8,764                     | (16.2) | 13,168              | (16.4) |
| Cancer                                | 2,629                            | (10.0) | 5,312                     | (9.8)  | 7,941               | (9.9)  |
| CHD                                   | 5,248                            | (19.9) | 11,252                    | (20.8) | 16,500              | (20.5) |
| CKD                                   | 495                              | (1.9)  | 753                       | (1.4)  | 1,248               | (1.6)  |
| CLD                                   | 195                              | (0.7)  | 423                       | (0.8)  | 618                 | (0.8)  |
| COPD                                  | 1,994                            | (7.6)  | 4,313                     | (8.0)  | 6,307               | (7.8)  |
| Dementia                              | 909                              | (3.5)  | 3,329                     | (6.2)  | 4,238               | (5.3)  |
| Diabetes                              | 4,194                            | (15.9) | 8,676                     | (16.0) | 12,870              | (16.0) |
| Heart failure                         | 1,789                            | (6.8)  | 5,028                     | (9.3)  | 6,817               | (8.5)  |
| Hypertension                          | 13,769                           | (52.3) | 27,388                    | (50.6) | 41,157              | (51.2) |
| Myopathy                              | 1,399                            | (5.3)  | 2,935                     | (5.4)  | 4,334               | (5.4)  |
| PAD                                   | 1,627                            | (6.2)  | 3,579                     | (6.6)  | 5,206               | (6.5)  |
| TIA                                   | 3,031                            | (11.5) | 8,141                     | (15.1) | 11,172              | (13.9) |
| <b>Smoking status (%)<sup>b</sup></b> |                                  |        |                           |        |                     |        |
| Current-smoker                        | 5,235                            | (17.2) | 10,141                    | (18.7) | 15,376              | (19.1) |
| Ex-smoker                             | 7,939                            | (30.1) | 14,588                    | (27.0) | 22,527              | (28.0) |
| Non-smoker                            | 13,165                           | (50.0) | 29,374                    | (54.3) | 42,539              | (52.9) |
| <b>BMI<sup>c</sup></b>                |                                  |        |                           |        |                     |        |
| Mean (SD)                             | 27.0                             | (5.2)  | 26.8                      | (5.3)  | 26.8                | (5.3)  |
| <b>Medications before stroke (%)</b>  |                                  |        |                           |        |                     |        |
| Statin <sup>d</sup>                   | 9,198                            | (34.9) | 15,906                    | (29.4) | 25,104              | (31.2) |
| High                                  | 2,038                            | (7.7)  | 3,301                     | (6.1)  | 5,339               | (6.6)  |
| Low/Medium                            | 7,155                            | (27.2) | 12,561                    | (23.2) | 19,716              | (24.5) |
| Other LLT                             | 686                              | (2.6)  | 1094                      | (2.0)  | 1,780               | (2.2)  |

**Notes:** a. A total of 36 (0.04%) patients had missing value of IMD: 9 (0.03%) and 27 (0.05%) for specified ischemic stroke and unspecified stroke, respectively. Group 1 is the least deprived group.

b. A total of 4,802 (6.0%) patients had missing value of smoking status: 1,058 (4.0%) and 3,744 (6.9%) for specified ischemic stroke and unspecified stroke, respectively.

c. A total of 13,570 (16.9%) patients had missing value of BMI: 3,645 (13.8%) and 9,925 (18.3%) for specified ischemic stroke and unspecified stroke, respectively.

d. A total of 49 (0.06%) patients had missing value of pre-stroke statin dose: 5 (0.05%) and 44 (0.08%) for specified ischemic stroke and unspecified stroke, respectively.

**Abbreviations:** AF, atrial fibrillation; BMI, body mass index; CHD, coronary heart disease; CKD, chronic kidney disease; CLD, chronic liver disease; COPD, chronic obstructive pulmonary disease; IMD, Index of Multiple Deprivation; LLT, lipid-lowering treatment; PAD, peripheral artery disease; SD, standard deviation; TIA, transient ischemic attack.

**Table S5. Statin use patterns within two years after first stroke**

|                                                         | Specified ischemic (%)<br>(n=19,575) | Unspecified (%)<br>(n=31,763) | Total<br>(N=51,338) |
|---------------------------------------------------------|--------------------------------------|-------------------------------|---------------------|
| <b>Initial prescription</b>                             |                                      |                               |                     |
| <b>Starting time after stroke</b>                       |                                      |                               |                     |
| Median (IQR), day                                       | 26 (12-55)                           | 26 (11-58)                    | 26 (12-57)          |
| 0-90                                                    | 16,669 (85.2)                        | 26,589 (83.7)                 | 43,258 (84.3)       |
| 91-365                                                  | 2,351 (12.0)                         | 3,971 (12.5)                  | 6,322 (12.3)        |
| 366-730                                                 | 555 (2.8)                            | 1203 (3.8)                    | 1758 (3.4)          |
| <b>Intensity<sup>a</sup></b>                            |                                      |                               |                     |
| Low                                                     | 1,760 (9.0)                          | 3,654 (11.5)                  | 5,414 (10.6)        |
| Medium                                                  | 14,613 (74.7)                        | 23,278 (73.3)                 | 37,891 (73.8)       |
| High                                                    | 3,177 (16.2)                         | 4,745 (14.9)                  | 7,922 (15.4)        |
| <b>Product</b>                                          |                                      |                               |                     |
| Atorvastatin                                            | 4,271 (21.8)                         | 7,100 (22.3)                  | 11,371 (22.2)       |
| Cerivastatin                                            | 25 (0.1)                             | 86 (0.3)                      | 111 (0.2)           |
| Fluvastatin                                             | 81 (0.4)                             | 171 (0.5)                     | 252 (0.5)           |
| Pravastatin                                             | 810 (4.1)                            | 1,695 (5.3)                   | 2,505 (4.9)         |
| Rosuvastatin                                            | 343 (1.8)                            | 490 (1.5)                     | 833 (1.6)           |
| Simvastatin                                             | 14,045 (71.8)                        | 22,221 (70.0)                 | 36,266 (70.6)       |
| <b>Subsequent prescriptions</b>                         |                                      |                               |                     |
| <b>Prescription number<sup>b</sup></b>                  |                                      |                               |                     |
| Median (IQR)                                            | 14 (9-24)                            | 14 (8-24)                     | 14 (9-24)           |
| 1                                                       | 742 (3.8)                            | 1,431 (4.5)                   | 2,173 (4.2)         |
| 2                                                       | 600 (3.1)                            | 1,085 (3.4)                   | 1,685 (3.3)         |
| 3 or more                                               | 18,233 (93.1)                        | 29,247 (92.1)                 | 47,480 (92.5)       |
| <b>Number of different intensities used<sup>c</sup></b> |                                      |                               |                     |
| 1                                                       | 16,859 (86.1)                        | 27,481 (86.5)                 | 44,340 (86.4)       |
| 2                                                       | 2,595 (13.3)                         | 4,090 (12.9)                  | 6,685 (13.0)        |
| 3                                                       | 120 (0.6)                            | 181 (0.6)                     | 301 (0.6)           |
| <b>Number of different statins used</b>                 |                                      |                               |                     |
| 1                                                       | 17,031 (87.0)                        | 27,841 (87.7)                 | 44,872 (87.4)       |
| 2                                                       | 2,347 (12.0)                         | 3,643 (11.5)                  | 5,990 (11.7)        |
| 3                                                       | 188 (1.0)                            | 264 (0.8)                     | 452 (0.9)           |
| 4                                                       | 9 (0.05)                             | 15 (0.05)                     | 24 (0.05)           |

**Notes:** a. A total of 111 (0.2%) patients had missing value of initial statin intensity: 25 (0.1%) and 86 (0.3%) for specified ischemic stroke and unspecified stroke, respectively. All the missing values were for cerivastatin.

b. This includes the first prescription.

c. A total of 12 (0.02%) patients had missing value of number of different intensities used: 1 (0.01%) and 11 (0.03%) for specified ischemic stroke and unspecified stroke, respectively. All the missing values were for cerivastatin.

**Abbreviation:** IQR, interquartile range.

**Table S6. Factors associated with statin use in a time partitioned analysis**

| Factor                   | First 90 days of follow-up |                      |                     | After first 90 days of follow-up |                      |                     |
|--------------------------|----------------------------|----------------------|---------------------|----------------------------------|----------------------|---------------------|
|                          | Crude HR<br>(95% CI)       | Adjusted HR (95% CI) |                     | Crude HR<br>(95% CI)             | Adjusted HR (95% CI) |                     |
|                          |                            | Model 1              | Model 2             |                                  | Model 1              | Model 2             |
| <b>Demographics</b>      |                            |                      |                     |                                  |                      |                     |
| Age (Year)               |                            |                      |                     |                                  |                      |                     |
| 18-44                    | 0.53 (0.49-0.56)***        | 0.53 (0.50-0.57)***  | 0.54 (0.50-0.59)*** | 0.44 (0.38-0.50)***              | 0.44 (0.39-0.51)***  | 0.43 (0.37-0.49)*** |
| 45-54                    | 0.91 (0.87-0.95)***        | 0.91 (0.88-0.95)***  | 0.89 (0.85-0.94)*** | 0.83 (0.75-0.92)***              | 0.83 (0.75-0.92)***  | 0.81 (0.72-0.90)*** |
| 55-64                    | Reference                  | Reference            | Reference           | Reference                        | Reference            | Reference           |
| 65-74                    | 0.89 (0.86-0.91)***        | 0.89 (0.87-0.92)***  | 0.91 (0.88-0.93)*** | 0.86 (0.81-0.93)***              | 0.87 (0.81-0.93)***  | 0.88 (0.81-0.95)**  |
| 75-84                    | 0.69 (0.67-0.71)***        | 0.70 (0.67-0.72)***  | 0.74 (0.72-0.77)*** | 0.58 (0.54-0.62)***              | 0.58 (0.54-0.62)***  | 0.65 (0.60-0.71)*** |
| 85+                      | 0.42 (0.41-0.44)***        | 0.43 (0.41-0.45)***  | 0.50 (0.48-0.53)*** | 0.28 (0.25-0.31)***              | 0.29 (0.26-0.31)***  | 0.35 (0.32-0.39)*** |
| Female                   | 0.82 (0.81-0.84)***        | 0.93 (0.91-0.94)***  | 0.99 (0.96-1.01)    | 0.76 (0.73-0.80)***              | 0.92 (0.88-0.96)***  | 0.99 (0.94-1.04)    |
| IMD (Quintile)           |                            |                      |                     |                                  |                      |                     |
| Group 1 (least deprived) | Reference                  | Reference            | Reference           | Reference                        | Reference            | Reference           |
| Group 2                  | 0.98 (0.94-1.04)           | 0.98 (0.94-1.03)     | 1.00 (0.96-1.04)    | 0.92 (0.84-1.01)                 | 0.91 (0.83-0.99)*    | 0.87 (0.79-0.95)**  |
| Group 3                  | 1.00 (0.95-1.05)           | 0.99 (0.94-1.03)     | 0.98 (0.94-1.02)    | 0.96 (0.88-1.05)                 | 0.96 (0.88-1.04)     | 0.93 (0.85-1.02)    |
| Group 4                  | 1.04 (0.98-1.09)           | 1.00 (0.95-1.05)     | 0.99 (0.95-1.04)    | 1.01 (0.92-1.10)                 | 0.96 (0.87-1.04)     | 0.95 (0.86-1.04)    |
| Group 5                  | 1.00 (0.95-1.05)           | 0.94 (0.90-0.99)*    | 0.98 (0.94-1.03)    | 0.99 (0.91-1.08)                 | 0.91 (0.84-1.00)*    | 0.94 (0.86-1.02)    |
| <b>Prior conditions</b>  |                            |                      |                     |                                  |                      |                     |
| AF                       | 0.90 (0.87-0.92)***        | 1.00 (0.98-1.03)     | 0.90 (0.87-0.93)*** | 0.88 (0.83-0.94)***              | 1.02 (0.96-1.08)     | 0.93 (0.86-1.00)*   |
| Cancer                   | 0.93 (0.90-0.96)***        | 0.98 (0.95-1.01)     | 0.89 (0.86-0.92)*** | 0.91 (0.84-0.99)*                | 0.97 (0.89-1.05)     | 0.86 (0.78-0.94)**  |
| CHD                      | 1.21 (1.18-1.24)***        | 1.25 (1.22-1.28)***  | 1.20 (1.17-1.23)*** | 1.24 (1.17-1.31)***              | 1.36 (1.28-1.44)***  | 1.35 (1.26-1.44)*** |
| CKD                      | 1.34 (1.24-1.44)***        | 1.42 (1.32-1.53)***  | 1.04 (0.97-1.12)    | 1.04 (0.84-1.29)                 | 1.15 (0.93-1.41)     | 0.78 (0.62-0.97)*   |
| CLD                      | 0.81 (0.72-0.90)***        | 0.71 (0.64-0.80)***  | 0.68 (0.60-0.77)*** | 0.73 (0.56-0.96)***              | 0.61 (0.49-0.80)***  | 0.55 (0.41-0.73)*** |
| COPD                     | 1.03 (1.00-1.07)           | 1.02 (0.98-1.05)     | 0.98 (0.95-1.02)    | 0.92 (0.84-1.00)                 | 0.88 (0.80-0.96)**   | 0.82 (0.74-0.91)*** |
| Dementia                 | 0.46 (0.43-0.50)***        | 0.58 (0.54-0.62)***  | 0.65 (0.61-0.70)*** | 0.30 (0.25-0.35)***              | 0.39 (0.33-0.46)***  | 0.46 (0.38-0.55)*** |
| Diabetes                 | 1.26 (1.23-1.29)***        | 1.21 (1.18-1.24)***  | 1.07 (1.05-1.10)*** | 1.31 (1.24-1.39)***              | 1.25 (1.18-1.32)***  | 1.12 (1.05-1.20)*** |
| Heart failure            | 0.77 (0.74-0.80)***        | 0.89 (0.84-0.91)***  | 0.88 (0.84-0.92)*** | 0.65 (0.59-0.72)***              | 0.80 (0.72-0.89)***  | 0.79 (0.71-0.89)*** |
| Hypertension             | 1.19 (1.16-1.21)***        | 1.24 (1.21-1.26)***  | 1.09 (1.07-1.12)*** | 1.19 (1.13-1.24)***              | 1.24 (1.19-1.30)***  | 1.12 (1.07-1.18)*** |
| Myopathy                 | 1.02 (0.98-1.06)           | 1.10 (1.05-1.14)***  | 0.97 (0.92-1.01)    | 0.95 (0.85-1.05)                 | 1.04 (0.94-1.16)     | 0.82 (0.73-0.93)*   |
| PAD                      | 1.06 (1.02-1.10)**         | 1.06 (1.02-1.11)**   | 1.00 (0.96-1.04)    | 1.13 (1.03-1.14)**               | 1.14 (1.04-1.25)**   | 1.12 (1.02-1.23)*   |
| TIA                      | 1.05 (1.02-1.08)**         | 1.10 (1.06-1.13)***  | 1.14 (1.11-1.17)*** | 0.84 (0.78-0.90)***              | 0.90 (0.84-0.96)**   | 0.91 (0.86-1.00)    |
| <b>Smoking status</b>    |                            |                      |                     |                                  |                      |                     |
| Current-smoker           | 1.18 (1.15-1.21)***        | 0.99 (0.96-1.01)     | 1.04 (1.01-1.07)**  | 1.41 (1.33-1.49)***              | 1.10 (1.04-1.17)***  | 1.21 (1.13-1.29)*** |

| Factor                        | First 90 days of follow-up |                      |                     | After first 90 days of follow-up |                      |                     |
|-------------------------------|----------------------------|----------------------|---------------------|----------------------------------|----------------------|---------------------|
|                               | Crude HR<br>(95% CI)       | Adjusted HR (95% CI) |                     | Crude HR<br>(95% CI)             | Adjusted HR (95% CI) |                     |
|                               |                            | Model 1              | Model 2             |                                  | Model 1              | Model 2             |
| Ex-smoker                     | 1.27 (1.24-1.30)***        | 1.18 (1.15-1.21)***  | 1.10 (1.08-1.13)*** | 1.32 (1.25-1.39)***              | 1.20 (1.14-1.27)***  | 1.13 (1.06-1.20)*** |
| Non-smoker                    | Reference                  | Reference            | Reference           | Reference                        | Reference            | Reference           |
| <b>BMI</b>                    |                            |                      |                     |                                  |                      |                     |
| <18.5                         | 0.75 (0.70-0.80)***        | 0.79 (0.74-0.85)***  | 0.79 (0.73-0.85)*** | 0.70 (0.60-0.82)***              | 0.74 (0.63-0.87)***  | 0.73 (0.62-0.86)*** |
| 18.5-24                       | Reference                  | Reference            | Reference           | Reference                        | Reference            | Reference           |
| 25-29                         | 1.19 (1.16-1.22)***        | 1.13 (1.10-1.16)***  | 1.09 (1.06-1.12)*** | 1.23 (1.17-1.31)***              | 1.15 (1.09-1.22)***  | 1.12 (1.06-1.19)*** |
| 30-34                         | 1.31 (1.27-1.35)***        | 1.20 (1.17-1.24)***  | 1.09 (1.06-1.13)*** | 1.40 (1.30-1.50)***              | 1.24 (1.15-1.33)***  | 1.15 (1.07-1.24)*** |
| 35-                           | 1.39 (1.33-1.44)***        | 1.24 (1.19-1.29)***  | 1.07 (1.03-1.12)**  | 1.53 (1.39-1.68)***              | 1.27 (1.15-1.40)***  | 1.11 (1.00-1.23)*   |
| <b>Pre-stroke medications</b> |                            |                      |                     |                                  |                      |                     |
| Statins                       | 2.75 (2.67-2.84)***        | 2.61 (2.54-2.69)***  | 2.32 (2.26-2.39)*** | 3.78 (3.56-4.01)***              | 3.52 (3.31-3.74)***  | 2.85 (2.67-3.05)*** |
| High intensity                | 2.80 (2.69-2.91)***        | 2.55 (2.45-2.66)***  | 2.27 (2.18-2.37)*** | 4.30 (3.82-4.84)***              | 3.67 (3.25-4.15)***  | 2.92 (2.56-3.33)*** |
| Low/Medium intensity          | 2.74 (2.65-2.82)***        | 2.63 (2.55-2.72)***  | 2.33 (2.27-2.37)*** | 3.68 (3.45-3.93)***              | 3.50 (3.28-3.74)***  | 2.84 (2.64-3.05)*** |
| No statin use                 | Reference                  | Reference            | Reference           | Reference                        | Reference            | Reference           |
| Other LLT                     | 1.04 (0.97-1.10)           | 0.95 (0.89-1.01)     | 0.68 (0.64-0.73)*** | 0.87 (0.75-1.01)                 | 0.75 (0.65-0.87)***  | 0.48 (0.42-0.56)*** |

**Notes:** \*\*\*P-value <0.001, \*\*<0.01, \*<0.05.

Model 1: This model included demographics (age, gender, IMD) for adjustment.

Model 2: This model included demographics (age, gender, IMD), prior conditions (AF, cancer, CHD, CKD, CLD, COPD, dementia, diabetes, heart failure, hypertension, myopathy, PAD, TIA), smoking, and BMI for adjustment.

**Abbreviations:** AF, atrial fibrillation; BMI, body mass index; CHD, coronary heart disease; CI, confidence interval; CKD, chronic kidney disease; CLD, chronic liver disease; COPD, chronic obstructive pulmonary disease; HR: hazard ratio; IMD, Index of Multiple Deprivation; LLT, lipid-lowering treatment; PAD, peripheral artery disease; RR: risk ratio; TIA, transient ischemic attack.



**Table S7. Sensitivity analysis for factors associated with statin use and high-intensity statin use in patients with specified ischemic stroke codes**

| Factor                   | Statin use           |                      |                     | High-intensity statin use |                      |                     |  |
|--------------------------|----------------------|----------------------|---------------------|---------------------------|----------------------|---------------------|--|
|                          | Crude HR<br>(95% CI) | Adjusted HR (95% CI) |                     | Crude RR<br>(95% CI)      | Adjusted RR (95% CI) |                     |  |
|                          |                      | Model 1              | Model 2             |                           | Model 1              | Model 2             |  |
| <b>Demographics</b>      |                      |                      |                     |                           |                      |                     |  |
| Age (Year)               |                      |                      |                     |                           |                      |                     |  |
| 18-44                    | 0.48 (0.44-0.52)***  | 0.49 (0.45-0.53)***  | 0.49 (0.44-0.54)*** | 0.79 (0.66-0.93)**        | 0.78 (0.66-0.93)**   | 0.80 (0.66-0.97)*   |  |
| 45-54                    | 0.89 (0.84-0.95)***  | 0.90 (0.85-0.95)***  | 0.89 (0.83-0.95)*** | 1.03 (0.93-1.14)          | 1.03 (0.93-1.14)     | 1.06 (0.97-1.17)    |  |
| 55-64                    | Reference            | Reference            | Reference           | Reference                 | Reference            | Reference           |  |
| 65-74                    | 0.94 (0.90-0.98)**   | 0.94 (0.91-0.98)**   | 0.93 (0.88-0.97)**  | 0.89 (0.83-0.96)**        | 0.89 (0.83-0.95)**   | 0.83 (0.77-0.90)*** |  |
| 75-84                    | 0.77 (0.74-0.80)***  | 0.78 (0.74-0.81)***  | 0.78 (0.75-0.82)*** | 0.74 (0.69-0.80)***       | 0.73 (0.68-0.79)***  | 0.67 (0.62-0.73)*** |  |
| 85+                      | 0.52 (0.49-0.55)***  | 0.53 (0.50-0.56)***  | 0.56 (0.52-0.60)*** | 0.49 (0.44-0.56)***       | 0.49 (0.43-0.55)***  | 0.44 (0.38-0.50)*** |  |
| Female                   | 0.85 (0.83-0.88)***  | 0.92 (0.90-0.95)***  | 0.96 (0.93-0.99)*   | 1.00 (0.95-1.06)          | 1.07 (1.02-1.13)*    | 1.14 (1.08-1.20)*** |  |
| IMD (Quintile)           |                      |                      |                     |                           |                      |                     |  |
| Group 1 (least deprived) | Reference            | Reference            | Reference           | Reference                 | Reference            | Reference           |  |
| Group 2                  | 0.99 (0.93-1.06)     | 0.99 (0.94-1.05)     | 0.99 (0.94-1.04)    | 1.05 (0.94-1.18)          | 1.05 (0.94-1.17)     | 1.05 (0.94-1.17)    |  |
| Group 3                  | 1.00 (0.94-1.06)     | 1.00 (0.94-1.05)     | 0.99 (0.94-1.04)    | 1.00 (0.90-1.11)          | 0.99 (0.89-1.10)     | 0.94 (0.85-1.05)    |  |
| Group 4                  | 1.00 (0.95-1.06)     | 0.98 (0.93-1.04)     | 0.97 (0.92-1.02)    | 1.08 (0.96-1.21)          | 1.05 (0.94-1.17)     | 1.00 (0.89-1.11)    |  |
| Group 5                  | 0.98 (0.92-1.04)     | 0.95 (0.89-1.01)     | 0.96 (0.91-1.02)    | 1.08 (0.96-1.22)          | 1.03 (0.92-1.16)     | 0.98 (0.88-1.10)    |  |
| <b>Prior condition</b>   |                      |                      |                     |                           |                      |                     |  |
| AF                       | 0.88 (0.84-0.91)***  | 0.94 (0.90-0.98)**   | 0.87 (0.83-0.91)*** | 0.86 (0.80-0.93)***       | 0.95 (0.88-1.03)     | 0.87 (0.80-0.95)**  |  |
| Cancer                   | 0.91 (0.87-0.96)***  | 0.95 (0.90-0.99)*    | 0.90 (0.85-0.95)*** | 0.91 (0.82-1.01)          | 0.99 (0.89-1.09)     | 0.98 (0.88-1.08)    |  |
| CHD                      | 1.21 (1.17-1.26)***  | 1.24 (1.19-1.28)***  | 1.19 (1.15-1.24)*** | 1.57 (1.47-1.68)***       | 1.69 (1.58-1.80)***  | 1.59 (1.48-1.71)*** |  |
| CKD                      | 1.15 (1.04-1.28)**   | 1.22 (1.10-1.36)***  | 0.96 (0.86-1.07)    | 1.24 (1.04-1.49)*         | 1.34 (1.12-1.61)**   | 0.97 (0.82-1.15)    |  |
| CLD                      | 0.78 (0.66-0.92)**   | 0.72 (0.61-0.85)***  | 0.69 (0.57-0.83)*** | 0.92 (0.63-1.35)          | 0.86 (0.59-1.25)     | 0.86 (0.58-1.26)    |  |
| COPD                     | 1.04 (0.99-1.10)     | 1.01 (0.96-1.06)     | 0.97 (0.92-1.03)    | 1.09 (0.99-1.20)          | 1.11 (1.00-1.22)*    | 0.97 (0.88-1.08)    |  |
| Dementia                 | 0.58 (0.52-0.64)***  | 0.68 (0.61-0.75)***  | 0.68 (0.61-0.76)*** | 0.76 (0.59-0.98)*         | 0.90 (0.70-1.16)     | 0.89 (0.70-1.14)    |  |
| Diabetes                 | 1.22 (1.18-1.27)***  | 1.19 (1.14-1.23)***  | 1.09 (1.05-1.13)*** | 1.45 (1.36-1.56)***       | 1.45 (1.36-1.56)***  | 1.23 (1.15-1.32)*** |  |
| Heart failure            | 0.84 (0.78-0.90)***  | 0.92 (0.86-0.98)*    | 0.92 (0.86-0.98)*   | 1.20 (1.07-1.34)***       | 1.33 (1.19-1.50)***  | 1.11 (0.99-1.24)    |  |
| Hypertension             | 1.15 (1.11-1.18)***  | 1.18 (1.15-1.22)***  | 1.09 (1.06-1.13)*** | 1.21 (1.14-1.27)***       | 1.29 (1.22-1.36)***  | 1.19 (1.13-1.26)*** |  |
| Myopathy                 | 0.99 (0.93-1.06)     | 1.04 (0.98-1.11)     | 0.94 (0.88-1.01)    | 1.07 (0.96-1.20)          | 1.16 (1.04-1.29)**   | 1.07 (0.96-1.19)    |  |
| PAD                      | 1.12 (1.06-1.18)***  | 1.11 (1.05-1.17)***  | 1.04 (0.98-1.10)    | 1.36 (1.24-1.49)***       | 1.41 (1.29-1.54)***  | 1.16 (1.06-1.27)**  |  |
| TIA                      | 1.07 (1.03-1.12)**   | 1.09 (1.04-1.14)***  | 1.10 (1.04-1.15)*** | 1.04 (0.96-1.13)          | 1.07 (0.99-1.16)     | 1.07 (0.98-1.16)    |  |
| <b>Smoking status</b>    |                      |                      |                     |                           |                      |                     |  |
| Current-smoker           | 1.13 (1.09-1.17)***  | 1.00 (0.97-1.04)     | 1.04 (1.00-1.08)    | 1.22 (1.14-1.31)***       | 1.09 (1.02-1.17)*    | 1.15 (1.06-1.24)*** |  |
| Ex-smoker                | 1.19 (1.15-1.23)***  | 1.12 (1.08-1.16)***  | 1.06 (1.02-1.10)**  | 1.15 (1.08-1.22)***       | 1.14 (1.07-1.21)***  | 1.09 (1.02-1.16)**  |  |

| Factor                        | Statin use           |                      |                     | High-intensity statin use |                      |                     |
|-------------------------------|----------------------|----------------------|---------------------|---------------------------|----------------------|---------------------|
|                               | Crude HR<br>(95% CI) | Adjusted HR (95% CI) |                     | Crude RR<br>(95% CI)      | Adjusted RR (95% CI) |                     |
|                               |                      | Model 1              | Model 2             |                           | Model 1              | Model 2             |
| Non-smoker                    | Reference            | Reference            | Reference           | Reference                 | Reference            | Reference           |
| <b>BMI</b>                    |                      |                      |                     |                           |                      |                     |
| <18.5                         | 0.75 (0.67-0.83)***  | 0.79 (0.71-0.88)***  | 0.79 (0.71-0.86)*** | 0.89 (0.68-1.17)          | 0.90 (0.69-1.18)     | 0.91 (0.70-1.17)    |
| 18.5-24                       | Reference            | Reference            | Reference           | Reference                 | Reference            | Reference           |
| 25-29                         | 1.16 (1.12-1.20)***  | 1.11 (1.07-1.15)***  | 1.08 (1.04-1.12)*** | 1.19 (1.11-1.28)***       | 1.16 (1.08-1.24)***  | 1.11 (1.04-1.19)**  |
| 30-34                         | 1.26 (1.20-1.31)***  | 1.18 (1.13-1.23)***  | 1.10 (1.05-1.15)*** | 1.36 (1.26-1.48)***       | 1.29 (1.19-1.40)***  | 1.14 (1.05-1.23)**  |
| 35-                           | 1.28 (1.21-1.36)***  | 1.19 (1.12-1.26)***  | 1.05 (0.99-1.12)    | 1.42 (1.29-1.57)***       | 1.29 (1.17-1.43)***  | 1.07 (0.97-1.18)    |
| <b>Pre-stroke medications</b> |                      |                      |                     |                           |                      |                     |
| Statins                       | 2.34 (2.25-2.42)***  | 2.27 (2.18-2.35)***  | 2.14 (2.06-2.23)*** | 1.86 (1.75-1.98)***       | 1.94 (1.82-2.06)***  | 1.62 (1.51-1.74)*** |
| High intensity                | 2.38 (2.26-2.51)***  | 2.23 (2.12-2.35)***  | 2.12 (2.00-2.25)*** | 4.89 (4.58-5.21)***       | 4.89 (4.59-5.22)***  | 4.34 (4.03-4.68)*** |
| Low/Medium intensity          | 2.32 (2.24-2.41)***  | 2.28 (2.19-2.36)***  | 2.15 (2.07-2.24)*** | 0.97 (0.90-1.05)          | 1.02 (0.94-1.09)     | 0.96 (0.88-1.05)    |
| No statin use                 | Reference            | Reference            | Reference           | Reference                 | Reference            | Reference           |
| Other LLT                     | 0.89 (0.81-0.97)**   | 0.84 (0.77-0.92)***  | 0.65 (0.59-0.71)*** | 2.23 (2.03-2.45)***       | 2.16 (1.97-2.37)***  | 1.59 (1.46-1.74)*** |

**Notes:** \*\*\*P-value <0.001, \*\*<0.01, \*<0.05

Model 1: This model included demographics (age, gender, IMD) for adjustment.

Model 2: This model included demographics (age, gender, IMD), prior conditions (AF, cancer, CHD, CKD, CLD, COPD, dementia, diabetes, heart failure, hypertension, myopathy, PAD, TIA), smoking, BMI, and period of stroke for adjustment.

**Abbreviations:** AF, atrial fibrillation; BMI, body mass index; CHD, coronary heart disease; CI, confidence interval; CKD, chronic kidney disease; CLD, chronic liver disease; COPD, chronic obstructive pulmonary disease; HR: hazard ratio; IMD, Index of Multiple Deprivation; LLT, lipid-lowering treatment; PAD, peripheral artery disease; RR: risk ratio; TIA, transient ischemic attack.

**Table S8. Sensitivity analysis for factors associated with statin use and high-intensity statin use in patients with no prior statin treatment**

| Factor                   | Statin use           |                      |                     | High-intensity statin use |                      |                     |
|--------------------------|----------------------|----------------------|---------------------|---------------------------|----------------------|---------------------|
|                          | Crude HR<br>(95% CI) | Adjusted HR (95% CI) |                     | Crude RR<br>(95% CI)      | Adjusted RR (95% CI) |                     |
|                          |                      | Model 1              | Model 2             |                           | Model 1              | Model 2             |
| <b>Demographics</b>      |                      |                      |                     |                           |                      |                     |
| Age (Year)               |                      |                      |                     |                           |                      |                     |
| 18-44                    | 0.55 (0.51-0.59)***  | 0.55 (0.52-0.59)***  | 0.49 (0.46-0.53)*** | 0.98 (0.86-1.13)          | 0.98 (0.86-1.13)     | 0.91 (0.77-1.06)    |
| 45-54                    | 0.93 (0.89-0.98)**   | 0.93 (0.89-0.98)**   | 0.85 (0.81-0.89)*** | 1.03 (1.03-1.24)**        | 1.13 (1.04-1.24)**   | 1.09 (0.98-1.20)    |
| 55-64                    | Reference            | Reference            | Reference           | Reference                 | Reference            | Reference           |
| 65-74                    | 0.80 (0.77-0.83)***  | 0.80 (0.77-0.83)***  | 0.86 (0.83-0.90)*** | 0.86 (0.80-0.93)***       | 0.85 (0.79-0.92)***  | 0.86 (0.79-0.94)**  |
| 75-84                    | 0.56 (0.54-0.58)***  | 0.56 (0.54-0.58)***  | 0.68 (0.66-0.71)*** | 0.71 (0.66-0.77)***       | 0.70 (0.65-0.76)***  | 0.70 (0.64-0.76)*** |
| 85+                      | 0.32 (0.31-0.34)***  | 0.33 (0.31-0.34)***  | 0.44 (0.41-0.46)*** | 0.53 (0.47-0.60)***       | 0.52 (0.45-0.59)***  | 0.52 (0.45-0.60)*** |
| Female                   | 0.81 (0.79-0.83)***  | 0.95 (0.93-0.98)***  | 0.98 (0.95-1.01)    | 1.00 (0.95-1.06)          | 1.08 (1.02-1.15)**   | 1.10 (1.04-1.16)*** |
| IMD (Quintile)           |                      |                      |                     |                           |                      |                     |
| Group 1 (least deprived) | Reference            | Reference            | Reference           | Reference                 | Reference            | Reference           |
| Group 2                  | 0.95 (0.89-1.00)     | 0.94 (0.89-0.99)*    | 0.95 (0.91-1.00)*   | 1.02 (0.91-1.15)          | 1.02 (0.91-1.14)     | 1.04 (0.93-1.17)    |
| Group 3                  | 0.98 (0.92-1.03)     | 0.96 (0.92-1.02)     | 0.96 (0.92-1.01)    | 0.97 (0.87-1.09)          | 0.95 (0.85-1.07)     | 0.94 (0.83-1.05)    |
| Group 4                  | 0.99 (0.93-1.05)     | 0.94 (0.89-1.00)     | 0.95 (0.90-1.00)*   | 1.03 (0.91-1.15)          | 0.99 (0.89-1.11)     | 0.97 (0.86-1.09)    |
| Group 5                  | 0.94 (0.88-0.99)*    | 0.87 (0.82-0.91)***  | 0.93 (0.88-0.98)**  | 0.97 (0.86-1.11)          | 0.93 (0.81-1.05)     | 0.91 (0.80-1.03)    |
| <b>Prior condition</b>   |                      |                      |                     |                           |                      |                     |
| AF                       | 0.76 (0.74-0.79)***  | 0.90 (0.87-0.94)***  | 0.84 (0.81-0.88)*** | 0.81 (0.74-0.90)***       | 0.92 (0.83-1.01)     | 0.86 (0.78-0.96)**  |
| Cancer                   | 0.89 (0.85-0.93)***  | 0.96 (0.92-1.01)     | 0.86 (0.83-0.91)*** | 0.94 (0.84-1.04)          | 1.04 (0.94-1.15)     | 1.00 (0.89-1.11)    |
| CHD                      | 0.65 (0.63-0.68)***  | 0.74 (0.71-0.78)***  | 0.82 (0.79-0.86)*** | 1.13 (1.03-1.24)**        | 1.27 (1.15-1.39)***  | 1.29 (1.16-1.43)*** |
| CKD                      | 1.05 (0.94-1.17)     | 1.18 (1.05-1.32)**   | 0.92 (0.81-1.03)    | 1.44 (1.15-1.80)**        | 1.58 (1.25-2.00)***  | 1.27 (1.00-1.61)*   |
| CLD                      | 0.82 (0.72-0.94)**   | 0.69 (0.60-0.79)***  | 0.64 (0.55-0.74)*** | 1.02 (0.72-1.42)          | 0.95 (0.68-1.33)     | 0.92 (0.64-1.32)    |
| COPD                     | 0.91 (0.87-0.96)***  | 0.92 (0.87-0.97)**   | 0.91 (0.87-0.96)*** | 0.97 (0.86-1.09)          | 1.03 (0.92-1.15)     | 0.98 (0.87-1.11)    |
| Dementia                 | 0.31 (0.28-0.34)***  | 0.41 (0.37-0.45)***  | 0.47 (0.42-0.52)*** | 0.54 (0.39-0.75)***       | 0.66 (0.48-0.92)*    | 0.67 (0.48-0.95)*   |
| Diabetes                 | 0.80 (0.77-0.84)***  | 0.80 (0.77-0.83)***  | 0.81 (0.79-0.85)*** | 1.03 (0.93-1.14)          | 1.06 (0.95-1.17)     | 1.01 (0.91-1.13)    |
| Heart failure            | 0.45 (0.42-0.48)***  | 0.57 (0.53-0.69)***  | 0.70 (0.65-0.75)*** | 1.02 (0.87-1.20)          | 1.17 (1.00-1.38)     | 1.09 (0.91-1.30)    |
| Hypertension             | 1.01 (0.99-1.04)     | 1.09 (1.06-1.12)***  | 1.04 (1.01-1.07)**  | 1.01 (0.96-1.07)          | 1.10 (1.04-1.16)**   | 1.10 (1.03-1.17)**  |
| Myopathy                 | 0.92 (0.88-0.97)**   | 1.03 (0.97-1.09)     | 0.94 (0.89-1.01)    | 1.01 (0.88-1.15)          | 1.09 (0.95-1.25)     | 1.06 (0.92-1.23)    |
| PAD                      | 0.71 (0.67-0.75)***  | 0.76 (0.72-0.81)***  | 0.89 (0.83-0.95)**  | 0.99 (0.86-1.15)          | 1.09 (0.94-1.27)     | 1.03 (0.88-1.22)    |
| TIA                      | 0.75 (0.72-0.78)***  | 0.82 (0.79-0.86)***  | 0.93 (0.89-0.97)**  | 0.94 (0.86-1.03)          | 0.97 (0.89-1.07)     | 0.97 (0.88-1.08)    |
| <b>Smoking status</b>    |                      |                      |                     |                           |                      |                     |
| Current-smoker           | 1.32 (1.28-1.36)***  | 1.04 (1.01-1.08)**   | 1.10 (1.06-1.14)*** | 1.23 (1.15-1.32)***       | 1.10 (1.02-1.18)*    | 1.16 (1.07-1.26)*** |
| Ex-smoker                | 1.23 (1.20-1.27)***  | 1.15 (1.12-1.18)***  | 1.11 (1.08-1.15)*** | 1.06 (0.99-1.14)***       | 1.07 (1.00-1.15)     | 1.07 (0.99-1.15)    |

| Factor                        | Statin use           |                      |                     | High-intensity statin use |                      |                     |
|-------------------------------|----------------------|----------------------|---------------------|---------------------------|----------------------|---------------------|
|                               | Crude HR<br>(95% CI) | Adjusted HR (95% CI) |                     | Crude RR<br>(95% CI)      | Adjusted RR (95% CI) |                     |
|                               |                      | Model 1              | Model 2             |                           | Model 1              | Model 2             |
| Non-smoker                    | Reference            | Reference            | Reference           | Reference                 | Reference            | Reference           |
| <b>BMI</b>                    |                      |                      |                     |                           |                      |                     |
| <18.5                         | 0.74 (0.69-0.80)***  | 0.79 (0.73-0.85)***  | 0.78 (0.72-0.84)*** | 0.81 (0.64-1.02)          | 0.81 (0.65-1.03)     | 0.80 (0.64-1.01)    |
| 18.5-24                       | Reference            | Reference            | Reference           | Reference                 | Reference            | Reference           |
| 25-29                         | 1.16 (1.13-1.20)***  | 1.10 (1.06-1.13)***  | 1.10 (1.06-1.13)*** | 1.09 (1.01-1.17)*         | 1.07 (1.00-1.15)     | 1.08 (1.00-1.15)*   |
| 30-34                         | 1.25 (1.20-1.30)***  | 1.12 (1.08-1.17)***  | 1.11 (1.07-1.16)*** | 1.10 (1.01-1.20)*         | 1.05 (0.96-1.15)     | 1.04 (0.95-1.13)    |
| 35-                           | 1.32 (1.25-1.39)***  | 1.12 (1.06-1.18)***  | 1.09 (1.03-1.15)**  | 1.15 (1.02-1.30)*         | 1.04 (0.92-1.18)     | 1.00 (0.88-1.14)    |
| <b>Pre-stroke medications</b> |                      |                      |                     |                           |                      |                     |
| Other LLT                     | 0.61 (0.56-0.68)***  | 0.57 (0.51-0.64)***  | 0.48 (0.43-0.54)*** | 1.67 (1.37-2.03)***       | 1.68 (1.38-2.05)***  | 1.47 (1.19-1.80)*** |

**Notes:** \*\*\*P-value < 0.001, \*\*<0.01, \*<0.05

Model 1: This model included demographics (age, gender, IMD) for adjustment.

Model 2: This model included demographics (age, gender, IMD), prior conditions (AF, cancer, CHD, CKD, CLD, COPD, dementia, diabetes, heart failure, hypertension, myopathy, PAD, TIA), smoking, BMI, and period of stroke for adjustment

**Abbreviations:** AF, atrial fibrillation; BMI, body mass index; CHD, coronary heart disease; CI, confidence interval; CKD, chronic kidney disease; CLD, chronic liver disease; COPD, chronic obstructive pulmonary disease; HR: hazard ratio; IMD, Index of Multiple Deprivation; LLT, lipid-lowering treatment; PAD, peripheral artery disease; RR: risk ratio; TIA, transient ischemic attack.

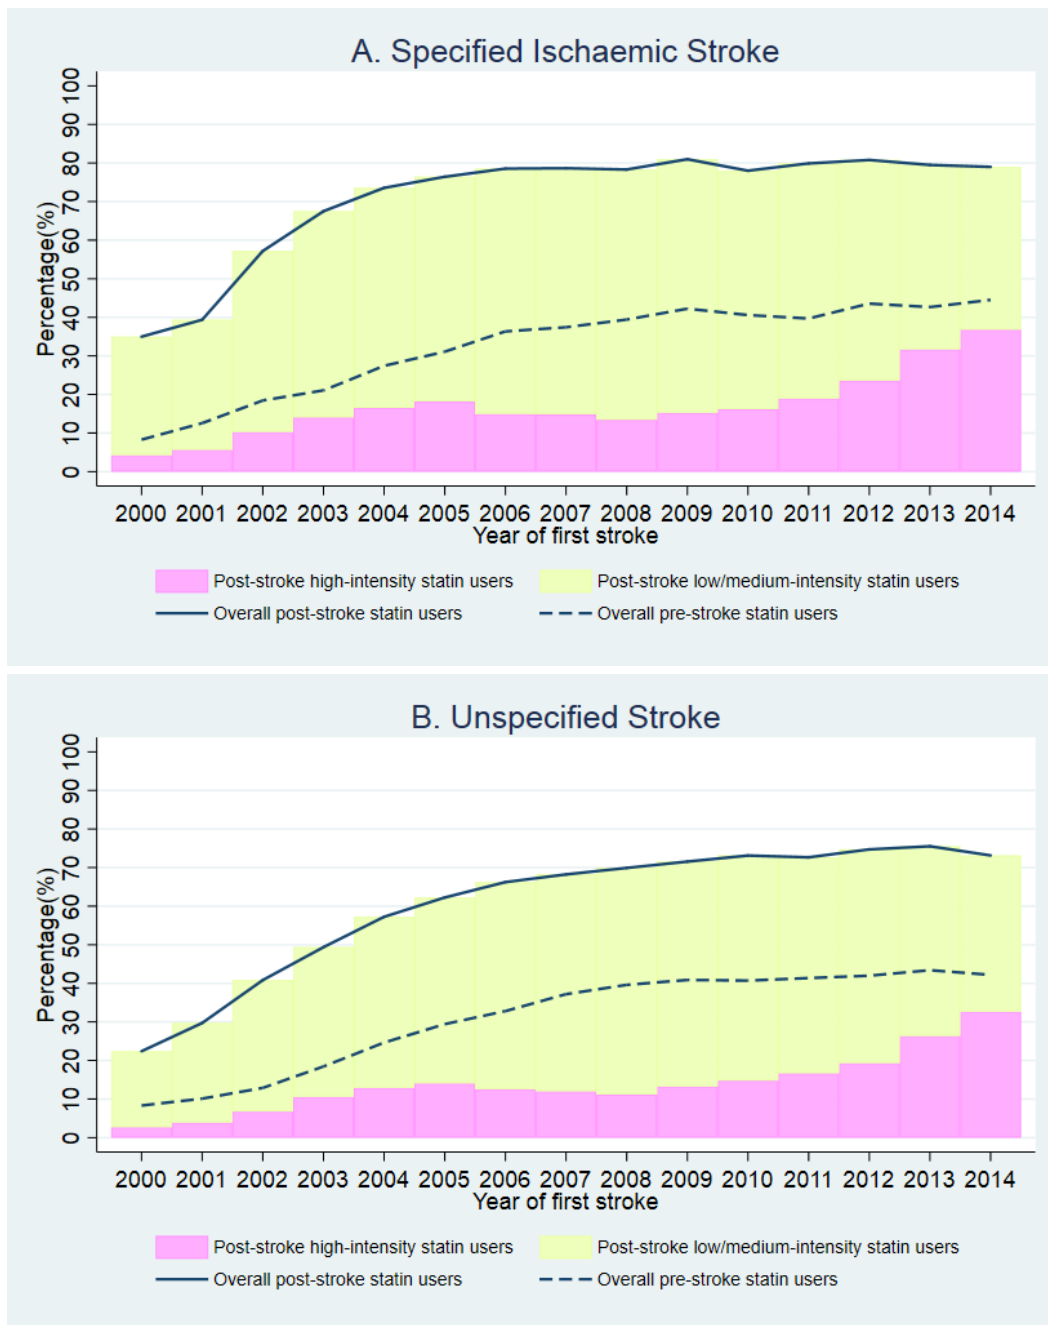

**Figure S1. Trend in statin and intensity use after stroke by stroke coding (A. Specified ischemic stroke; B. Unspecified stroke)**

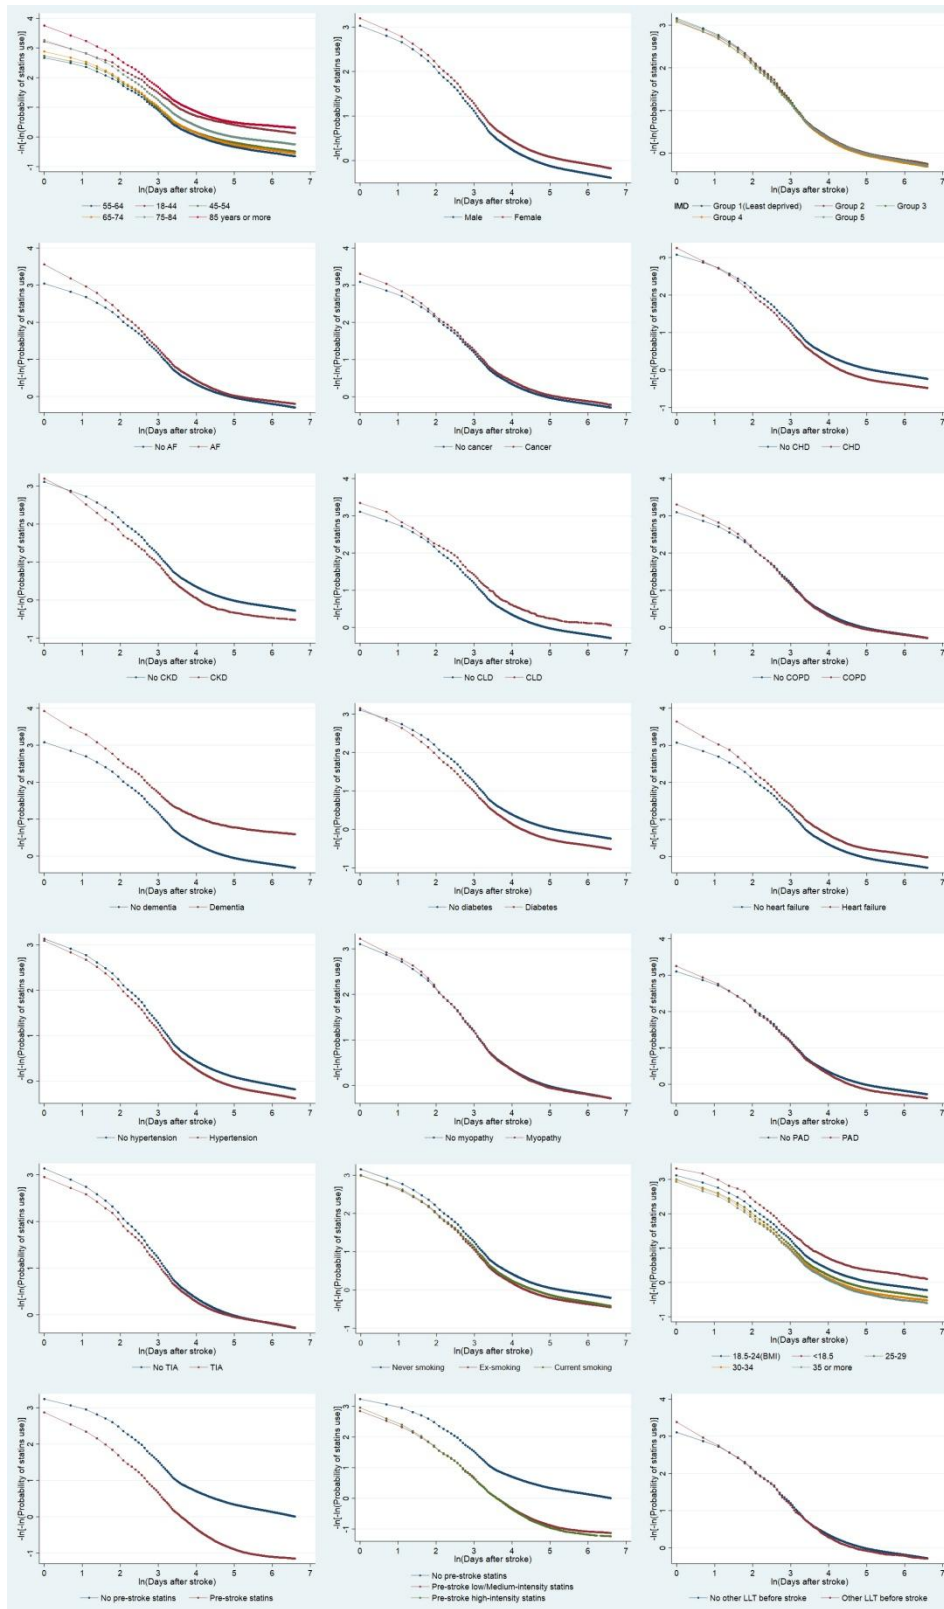

**Figure S2. Log-log plots for statin use after stroke**

**Abbreviations:** AF, atrial fibrillation; BMI, body mass index; CHD, coronary heart disease; CKD, chronic kidney disease; CLD, chronic liver disease; COPD, chronic obstructive pulmonary disease; IMD, Index of Multiple Deprivation; LLT, lipid-lowering treatment; PAD, peripheral artery disease; TIA, transient ischemic attack.

**The RECORD statement – checklist of items, extended from the STROBE statement**

|                           | <b>Item No.</b> | <b>STROBE items</b>                                                                                                                                                                           | <b>Location in manuscript where items are reported</b> | <b>RECORD items</b>                                                                                                                                                                                                                                                                                                                                                                                                                         | <b>Location in manuscript where items are reported</b>                                                                                                    |
|---------------------------|-----------------|-----------------------------------------------------------------------------------------------------------------------------------------------------------------------------------------------|--------------------------------------------------------|---------------------------------------------------------------------------------------------------------------------------------------------------------------------------------------------------------------------------------------------------------------------------------------------------------------------------------------------------------------------------------------------------------------------------------------------|-----------------------------------------------------------------------------------------------------------------------------------------------------------|
| <b>Title and abstract</b> |                 |                                                                                                                                                                                               |                                                        |                                                                                                                                                                                                                                                                                                                                                                                                                                             |                                                                                                                                                           |
|                           | 1               | (a) Indicate the study’s design with a commonly used term in the title or the abstract<br>(b) Provide in the abstract an informative and balanced summary of what was done and what was found | (a) Title and abstract<br><br>(b) Abstract             | RECORD 1.1: The type of data used should be specified in the title or abstract. When possible, the name of the databases used should be included.<br><br>RECORD 1.2: If applicable, the geographic region and timeframe within which the study took place should be reported in the title or abstract.<br><br>RECORD 1.3: If linkage between databases was conducted for the study, this should be clearly stated in the title or abstract. | RECORD 1.1: Title and abstract<br><br>RECORD 1.2: Title and abstract<br><br>RECORD 1.3: IMD data were linked, but this was only mentioned in the Methods. |
| <b>Introduction</b>       |                 |                                                                                                                                                                                               |                                                        |                                                                                                                                                                                                                                                                                                                                                                                                                                             |                                                                                                                                                           |
| Background rationale      | 2               | Explain the scientific background and rationale for the investigation being reported                                                                                                          | The first two paragraphs                               |                                                                                                                                                                                                                                                                                                                                                                                                                                             |                                                                                                                                                           |
| Objectives                | 3               | State specific objectives, including any prespecified hypotheses                                                                                                                              | The 3 <sup>rd</sup> paragraph                          |                                                                                                                                                                                                                                                                                                                                                                                                                                             |                                                                                                                                                           |
| <b>Methods</b>            |                 |                                                                                                                                                                                               |                                                        |                                                                                                                                                                                                                                                                                                                                                                                                                                             |                                                                                                                                                           |
| Study Design              | 4               | Present key elements of study design early in the paper                                                                                                                                       | Key elements including “Study                          |                                                                                                                                                                                                                                                                                                                                                                                                                                             |                                                                                                                                                           |

|              |   |                                                                                                                                                                                                                                                                                                                                                                                                                                                                                                                                                                       |                                                                                                                                                                                                            |                                                                                                                                                                                                                                                                                                                                                                                                                                                                                                                                                                                 |                                                                                                                                                                                                             |
|--------------|---|-----------------------------------------------------------------------------------------------------------------------------------------------------------------------------------------------------------------------------------------------------------------------------------------------------------------------------------------------------------------------------------------------------------------------------------------------------------------------------------------------------------------------------------------------------------------------|------------------------------------------------------------------------------------------------------------------------------------------------------------------------------------------------------------|---------------------------------------------------------------------------------------------------------------------------------------------------------------------------------------------------------------------------------------------------------------------------------------------------------------------------------------------------------------------------------------------------------------------------------------------------------------------------------------------------------------------------------------------------------------------------------|-------------------------------------------------------------------------------------------------------------------------------------------------------------------------------------------------------------|
|              |   |                                                                                                                                                                                                                                                                                                                                                                                                                                                                                                                                                                       | population”, “Statin use after stroke”, and “Covariates”                                                                                                                                                   |                                                                                                                                                                                                                                                                                                                                                                                                                                                                                                                                                                                 |                                                                                                                                                                                                             |
| Setting      | 5 | Describe the setting, locations, and relevant dates, including periods of recruitment, exposure, follow-up, and data collection                                                                                                                                                                                                                                                                                                                                                                                                                                       | All have been described in the Methods: setting (general practices), location (UK), dates (1 Jan 2000 to 31 Dec 2014), exposure (see “Covariates”), follow-up (two years) and data collection (from CPRD). |                                                                                                                                                                                                                                                                                                                                                                                                                                                                                                                                                                                 |                                                                                                                                                                                                             |
| Participants | 6 | <p>(a) <i>Cohort study</i> - Give the eligibility criteria, and the sources and methods of selection of participants. Describe methods of follow-up</p> <p><i>Case-control study</i> - Give the eligibility criteria, and the sources and methods of case ascertainment and control selection. Give the rationale for the choice of cases and controls</p> <p><i>Cross-sectional study</i> - Give the eligibility criteria, and the sources and methods of selection of participants</p> <p>(b) <i>Cohort study</i> - For matched studies, give matching criteria</p> | (a) <i>Cohort study</i> – the first two paragraphs in the Methods                                                                                                                                          | <p>RECORD 6.1: The methods of study population selection (such as codes or algorithms used to identify subjects) should be listed in detail. If this is not possible, an explanation should be provided.</p> <p>RECORD 6.2: Any validation studies of the codes or algorithms used to select the population should be referenced. If validation was conducted for this study and not published elsewhere, detailed methods and results should be provided.</p> <p>RECORD 6.3: If the study involved linkage of databases, consider use of a flow diagram or other graphical</p> | <p>RECORD 6.1: Stroke codes were listed in Table S1.</p> <p>RECORD 6.2: The methods were specified on the website provided in the 4<sup>th</sup> paragraph in the Methods.</p> <p>RECORD 6.3: Figure 1.</p> |



|                              |   |                                                                                                                                                                                      |                                                                                                                                          |                                                                                                                                                                                                                 |                                                                                                                                                                                            |
|------------------------------|---|--------------------------------------------------------------------------------------------------------------------------------------------------------------------------------------|------------------------------------------------------------------------------------------------------------------------------------------|-----------------------------------------------------------------------------------------------------------------------------------------------------------------------------------------------------------------|--------------------------------------------------------------------------------------------------------------------------------------------------------------------------------------------|
|                              |   | and number of exposed and unexposed<br><i>Case-control study</i> - For matched studies, give matching criteria and the number of controls per case                                   |                                                                                                                                          | display to demonstrate the data linkage process, including the number of individuals with linked data at each stage.                                                                                            |                                                                                                                                                                                            |
| Variables                    | 7 | Clearly define all outcomes, exposures, predictors, potential confounders, and effect modifiers. Give diagnostic criteria, if applicable.                                            | In the sections of “Statin use after stroke” and “Covariates” in the Methods.                                                            | RECORD 7.1: A complete list of codes and algorithms used to classify exposures, outcomes, confounders, and effect modifiers should be provided. If these cannot be reported, an explanation should be provided. | RECORD 7.1: The codes for the outcome (statins) were listed in Table S2. Codes for all the factors of interest were listed on the website provided in “Covariates” section in the Methods. |
| Data sources/<br>measurement | 8 | For each variable of interest, give sources of data and details of methods of assessment (measurement). Describe comparability of assessment methods if there is more than one group | The 1 <sup>st</sup> paragraph in the Methods.                                                                                            |                                                                                                                                                                                                                 |                                                                                                                                                                                            |
| Bias                         | 9 | Describe any efforts to address potential sources of bias                                                                                                                            | Specified in each paragraph in the Methods, for example, rigorous procedure in codes development, quality control in data cleansing, and |                                                                                                                                                                                                                 |                                                                                                                                                                                            |

|                        |    |                                                                                                                                                                                                                                                                                                                                                                                                                                                                                                                             |                                                                                                                                                      |  |  |
|------------------------|----|-----------------------------------------------------------------------------------------------------------------------------------------------------------------------------------------------------------------------------------------------------------------------------------------------------------------------------------------------------------------------------------------------------------------------------------------------------------------------------------------------------------------------------|------------------------------------------------------------------------------------------------------------------------------------------------------|--|--|
|                        |    |                                                                                                                                                                                                                                                                                                                                                                                                                                                                                                                             | examining proportional hazards assumption.                                                                                                           |  |  |
| Study size             | 10 | Explain how the study size was arrived at                                                                                                                                                                                                                                                                                                                                                                                                                                                                                   | In the section of “Study population” in the Methods. We included all eligible patients from the CPRD.                                                |  |  |
| Quantitative variables | 11 | Explain how quantitative variables were handled in the analyses. If applicable, describe which groupings were chosen, and why                                                                                                                                                                                                                                                                                                                                                                                               | In the section of “Covariates” in the Methods.                                                                                                       |  |  |
| Statistical methods    | 12 | (a) Describe all statistical methods, including those used to control for confounding<br>(b) Describe any methods used to examine subgroups and interactions<br>(c) Explain how missing data were addressed<br>(d) <i>Cohort study</i> - If applicable, explain how loss to follow-up was addressed<br><i>Case-control study</i> - If applicable, explain how matching of cases and controls was addressed<br><i>Cross-sectional study</i> - If applicable, describe analytical methods taking account of sampling strategy | (a)-(c) The section of “Statistical analysis” in the Methods.<br><br>(d) <i>Cohort study</i> – the section of “Statistical analysis” in the Methods. |  |  |

|                                  |    |                                                                                                                                                                                                                                                                                           |                                                                                           |                                                                                                                                                                                                                                                                                                                    |                                                                                                                                                        |
|----------------------------------|----|-------------------------------------------------------------------------------------------------------------------------------------------------------------------------------------------------------------------------------------------------------------------------------------------|-------------------------------------------------------------------------------------------|--------------------------------------------------------------------------------------------------------------------------------------------------------------------------------------------------------------------------------------------------------------------------------------------------------------------|--------------------------------------------------------------------------------------------------------------------------------------------------------|
|                                  |    | (e) Describe any sensitivity analyses                                                                                                                                                                                                                                                     | (e) The section of “Sensitivity analysis” in the Methods.                                 |                                                                                                                                                                                                                                                                                                                    |                                                                                                                                                        |
| Data access and cleaning methods |    | ..                                                                                                                                                                                                                                                                                        |                                                                                           | <p>RECORD 12.1: Authors should describe the extent to which the investigators had access to the database population used to create the study population.</p> <p>RECORD 12.2: Authors should provide information on the data cleaning methods used in the study.</p>                                                | <p>RECORD 12.1: the section of “Data source” in the Methods.</p> <p>RECORD 12.2: The section of “Statistical analysis” in the Methods and Table 3.</p> |
| Linkage                          |    | ..                                                                                                                                                                                                                                                                                        |                                                                                           | RECORD 12.3: State whether the study included person-level, institutional-level, or other data linkage across two or more databases. The methods of linkage and methods of linkage quality evaluation should be provided.                                                                                          | RECORD 12.3: Figure 1.                                                                                                                                 |
| <b>Results</b>                   |    |                                                                                                                                                                                                                                                                                           |                                                                                           |                                                                                                                                                                                                                                                                                                                    |                                                                                                                                                        |
| Participants                     | 13 | <p>(a) Report the numbers of individuals at each stage of the study (<i>e.g.</i>, numbers potentially eligible, examined for eligibility, confirmed eligible, included in the study, completing follow-up, and analysed)</p> <p>(b) Give reasons for non-participation at each stage.</p> | <p>(a) The 1<sup>st</sup> paragraph in the Results and Figure 1.</p> <p>(b) Figure 1.</p> | RECORD 13.1: Describe in detail the selection of the persons included in the study ( <i>i.e.</i> , study population selection) including filtering based on data quality, data availability and linkage. The selection of included persons can be described in the text and/or by means of the study flow diagram. | RECORD 13.1: Figure 1.                                                                                                                                 |

|                  |    |                                                                                                                                                                                                                                                                                                                                                 |                                                                                                                              |  |  |
|------------------|----|-------------------------------------------------------------------------------------------------------------------------------------------------------------------------------------------------------------------------------------------------------------------------------------------------------------------------------------------------|------------------------------------------------------------------------------------------------------------------------------|--|--|
|                  |    | (c) Consider use of a flow diagram                                                                                                                                                                                                                                                                                                              | (c) Figure 1.                                                                                                                |  |  |
| Descriptive data | 14 | (a) Give characteristics of study participants ( <i>e.g.</i> , demographic, clinical, social) and information on exposures and potential confounders<br>(b) Indicate the number of participants with missing data for each variable of interest<br>(c) <i>Cohort study</i> - summarise follow-up time ( <i>e.g.</i> , average and total amount) | (a) Table 1 and Table S4.<br><br>(b) Table 1.<br><br>(c) <i>Cohort study</i> – the 1 <sup>st</sup> paragraph in the Results. |  |  |
| Outcome data     | 15 | <i>Cohort study</i> - Report numbers of outcome events or summary measures over time<br><i>Case-control study</i> - Report numbers in each exposure category, or summary measures of exposure<br><i>Cross-sectional study</i> - Report numbers of outcome events or summary measures                                                            | <i>Cohort study</i> –Table 1, Figures 2 and 3.                                                                               |  |  |
| Main results     | 16 | (a) Give unadjusted estimates and, if applicable, confounder-adjusted estimates and their precision ( <i>e.g.</i> , 95% confidence interval). Make clear which confounders were adjusted for and why they were included<br>(b) Report category boundaries when continuous variables were categorized                                            | (a) Table 2.<br><br>(b) Table 1.                                                                                             |  |  |

|                   |    |                                                                                                                                                                            |                                                                                                  |                                                                                                                                                                                                                                                                                                          |                                                       |
|-------------------|----|----------------------------------------------------------------------------------------------------------------------------------------------------------------------------|--------------------------------------------------------------------------------------------------|----------------------------------------------------------------------------------------------------------------------------------------------------------------------------------------------------------------------------------------------------------------------------------------------------------|-------------------------------------------------------|
|                   |    | (c) If relevant, consider translating estimates of relative risk into absolute risk for a meaningful time period                                                           | (c) Not applicable but we did translate them into percentage risk reduction as shown in Table 3. |                                                                                                                                                                                                                                                                                                          |                                                       |
| Other analyses    | 17 | Report other analyses done— e.g., analyses of subgroups and interactions, and sensitivity analyses                                                                         | Figure 3, Tables S4-8 and Figures S1-2.                                                          |                                                                                                                                                                                                                                                                                                          |                                                       |
| <b>Discussion</b> |    |                                                                                                                                                                            |                                                                                                  |                                                                                                                                                                                                                                                                                                          |                                                       |
| Key results       | 18 | Summarise key results with reference to study objectives                                                                                                                   | The 1 <sup>st</sup> paragraph in the Discussion                                                  |                                                                                                                                                                                                                                                                                                          |                                                       |
| Limitations       | 19 | Discuss limitations of the study, taking into account sources of potential bias or imprecision. Discuss both direction and magnitude of any potential bias                 | The “Strengths and limitations” section.                                                         | RECORD 19.1: Discuss the implications of using data that were not created or collected to answer the specific research question(s). Include discussion of misclassification bias, unmeasured confounding, missing data, and changing eligibility over time, as they pertain to the study being reported. | RECORD 19.1: The “Strengths and limitations” section. |
| Interpretation    | 20 | Give a cautious overall interpretation of results considering objectives, limitations, multiplicity of analyses, results from similar studies, and other relevant evidence | The 1 <sup>st</sup> to 6 <sup>th</sup> paragraphs of the Discussion.                             |                                                                                                                                                                                                                                                                                                          |                                                       |
| Generalisability  | 21 | Discuss the generalisability (external validity) of the study results                                                                                                      | The last limitation mentioned in the “Strengths and limitations” section.                        |                                                                                                                                                                                                                                                                                                          |                                                       |

| Other Information                                         |    |                                                                                                                                                               |                            |                                                                                                                                                          |                                                                                                                                 |
|-----------------------------------------------------------|----|---------------------------------------------------------------------------------------------------------------------------------------------------------------|----------------------------|----------------------------------------------------------------------------------------------------------------------------------------------------------|---------------------------------------------------------------------------------------------------------------------------------|
| Funding                                                   | 22 | Give the source of funding and the role of the funders for the present study and, if applicable, for the original study on which the present article is based | No funding for this study. |                                                                                                                                                          |                                                                                                                                 |
| Accessibility of protocol, raw data, and programming code |    | ..                                                                                                                                                            |                            | RECORD 22.1: Authors should provide information on how to access any supplemental information such as the study protocol, raw data, or programming code. | Where applicable, the links to any relevant information or any supplementary materials were provided in the Methods or Results. |

\*Reference: Benchimol EI, Smeeth L, Guttman A, Harron K, Moher D, Petersen I, Sørensen HT, von Elm E, Langan SM, the RECORD Working Committee. The REporting of studies Conducted using Observational Routinely-collected health Data (RECORD) Statement. *PLoS Medicine* 2015; in press.

\*Checklist is protected under Creative Commons Attribution ([CC BY](https://creativecommons.org/licenses/by/4.0/)) license.
